1 Title: The sex-limited effects of mutations in the EGFR and TGF- $\beta$  signaling pathways on shape and size  
2 sexual dimorphism and allometry in the *Drosophila* wing.

3  
4 Authors:

5 Nicholas D. Testa<sup>1,2</sup>

6 Ian Dworkin<sup>1,2,3</sup>

7  
8 Author Affiliation:

9 1 - Department of Integrative Biology, Michigan State University

10 2 - Program in Ecology, Evolutionary Biology and Behavior, Michigan State University

11 3 - Department of Biology, McMaster University

12  
13 Author emails:

14 [dworkin@mcmaster.ca](mailto:dworkin@mcmaster.ca), [testanic@msu.edu](mailto:testanic@msu.edu)

15  
16 Keywords: Sexual dimorphism, size, shape, allometry, geometric morphometrics, signal transduction,  
17 *Drosophila*, mutational analysis

18  
19  
20 Number of Figures: 5

21 Number of Supplementary Figures: 1

22 Number of Tables: 1

23 Number of Supplementary Tables: 2

24  
25 Data Archiving: <http://dx.doi.org/10.5061/dryad.1041>

26 Scripts will be archived on github.

27  
28  
29  
30  
31  
32 **Abstract:** Much of the morphological diversity in nature—including among sexes within a species—is a  
33 direct consequence of variation in size and shape. However, disentangling variation in sexual dimorphism  
34 for both shape (SShD), size (SSD) and their relationship with one another remains complex. Understanding  
35 how genetic variation influences both size and shape together, and how this in turn influences SSD and  
36 SShD is challenging. In this study we utilize *Drosophila* wing size and shape as a model system to  
37 investigate how mutations influence size and shape as modulated by sex. Previous work has demonstrated  
38 that mutations in Epidermal Growth Factor Receptor (EGFR) and Transforming Growth Factor -  $\beta$  (TGF-  
39  $\beta$ ) signaling components can influence both wing size and shape. In this study we re-analyze this data to  
40 specifically address how they impact the relationship between size and shape in a sex-specific manner, in  
41 turn altering the pattern of sexual dimorphism. While most mutations influence shape overall, only a subset  
42 have a genotypic specific effect that influences SShD. Furthermore, while we observe sex-specific patterns  
43 of allometric shape variation, the effects of most mutations on allometry tend to be small. We discuss this  
44 within the context of using mutational analysis to understand sexual size and shape dimorphism.  
45

45 **Introduction:**

46  
47 In spite of our wealth of knowledge about the natural world, biologists continue to be fascinated by the  
48 prevalence of sexual dimorphism. Where sexual dimorphism is often found, it is most often subtle, despite  
49 important exceptions of sex-limited characteristics (Bonduriansky & Day 2003), or traits that are highly  
50 exaggerated in one sex, but not the other (Lavine et al. 2015). This is particularly evident for morphological  
51 traits that demonstrate sexual size (SSD) or sexual shape (SShD) dimorphism (Kijimoto et al. 2012).  
52 Within evolutionary biology, explanations for sexual dimorphism have focused on a number of  
53 mechanisms that are likely responsible for the origin and maintenance of sexual dimorphism (Reeve &  
54 Fairbairn 2001; Allen et al. 2011; Bonduriansky & Chenoweth 2009; Mank 2009; Cox & Calsbeek 2010;  
55 Hedrick & Temeles 1989; Shine 1989; Fairbairn & Blanckenhorn 2007) including sexual conflict,  
56 differences among the sexes in the variance of reproductive success leading to sexual selection (Fairbairn  
57 2005), and sex specific aspects of natural selection (Preziosi & Fairbairn 2000; Ferguson & Fairbairn  
58 2000). Despite this, our understanding of the genetic mechanisms that contribute to variation in sexual  
59 shape and size dimorphism is still lacking (Mank 2009; Blanckenhorn et al. 2007; Fairbairn & Roff 2006;  
60 Fairbairn 1990).

61  
62 There is considerable experimental evidence demonstrating that patterns of SSD and SShD can be altered  
63 by influencing the condition of individuals (Bonduriansky & Chenoweth 2009; Bonduriansky 2007). There  
64 has unfortunately been less success on directly experimentally evolving consistent changes SSD or SShD,  
65 with some notable exceptions where dimorphism evolved in response to selection on fecundity (Reeve &  
66 Fairbairn 1999) or due to experimental manipulation in the degree of sexual conflict (Prasad et al. 2007).  
67 There are even fewer instances where experimental evolution has been able to alter existing size/shape  
68 (allometry) relationships (Bolstad et al. 2015).

69  
70 Despite previous difficulties with directly selecting for SSD or SShD, we still find evidence for genetic  
71 variation in SSD within a number of species (David et al. 2003; Merila et al. 2011). Several studies have  
72 utilized induced mutations (Carreira et al. 2011) or defined genomic deletions to examine patterns of SSD  
73 (Takahashi & Blanckenhorn 2015). They find that, in general, mutations tend to attenuate differences in  
74 SSD and sexual developmental timing difference. Interestingly, while ~50% of the random insertion  
75 mutations influenced size and shape, only half of those were consistent between males and females,  
76 suggesting considerable sex limitation of the mutational effects (Carreira et al. 2011).

77  
78 With respect to the influence of mutations on sexual dimorphism, one important consideration is whether  
79 the mutations themselves are directly influencing aspects of sexual dimorphism. Alternatively, mutations  
80 may be influencing size and shape of the organism, but are modulated in a sex-limiting fashion. Arguably,  
81 it is difficult to distinguish between these possibilities, although for the purposes of this study, we consider  
82 a mutation to be modulated by the influence of sex if it influences size or shape as well as having an  
83 additional influence on sex (i.e. a sex-by-genotype interaction). The extent to which such mutations  
84 influence SSD and SShD remains poorly understood.

85  
86 To address these questions, we examined the influence of characterized induced mutations that influence  
87 two signaling pathways important for wing development, Epidermal Growth Factor Receptor (EGFR), and  
88 Transforming Growth Factor -  $\beta$ , (TGF- $\beta$ ). The *Drosophila* wing is an excellent model for the study of  
89 SSD and SShD. First, as it is a premiere model system for the study of development, and as such a great  
90 deal is known and understood about the mechanisms governing overall growth and patterning (García-  
91 Bellido et al. 1994; Weinkove et al. 1999; Day & Lawrence 2000; Weatherbee et al. 1998). Additionally,  
92 *Drosophila melanogaster* and closely related species have a strong pattern of sexual size dimorphism for  
93 many traits (and overall body size), with wing size demonstrating some of the greatest degree of overall  
94 dimorphism (Testa et al. 2013; Abbott et al. 2010; Gidaszewski et al. 2009). There is extensive variation  
95 for size and shape within and between *Drosophila* species, and for the extent of SSD and SShD as well  
96 (Gidaszewski et al. 2009). Importantly, the mutational target size for wing shape (Weber 2005) is high  
97 (~15% of the genome), thus providing plenty of opportunity for mutations to influencing shape, and  
98 potentially those modulated by sex.

99

100 In this study we utilize a previously published data set that examine the influence of 42 mutations in the  
101 EGFR and TGF- $\beta$  signaling pathways when examined in a heterozygous state. We re-analyze this data set  
102 to examine the extent to which the mutations have sex-limited phenotypic effects that influence SSD or  
103 SShD. Furthermore we examine how patterns of allometric variation between size and shape are altered by  
104 both sex and wild type genetic background of the mutations. Despite most mutations having substantial  
105 phenotypic effects on either size, shape or both, only a small subset of them appear to have their effects  
106 modulated by sex, with respect to both direction and magnitude of effects. Furthermore, we demonstrate  
107 that the allometric relationship between size and shape is only subtly influenced by sex and genetic  
108 background for these alleles. We discuss these results within the context of sex-limited effects of mutations  
109 and their influence on SSD and SShD, and how to interpret allometric relationships between size and shape  
110 in *Drosophila*.  
111  
112

112 **Materials and Methods:**

113

114 ***Provenance of Samples***

115 The data used for this study was originally published by (Dworkin & Gibson 2006). We compared wings  
116 from flies across several treatment groups, including: sex, wild type genetic background (Oregon-R and  
117 Samarkand), progenitor line and genotype (mutant vs. wild type allele). Fifty different p-element insertion  
118 lines, each marked with  $w^+$ , were introgressed into two common wild type backgrounds (Samarkand and  
119 Oregon-R), were used along with their respective controls. All wing data, in the form of landmarks, were  
120 collected from digital images, as detailed in Dworkin and Gibson (2006). For a more detailed description  
121 on the source of these strains and the experimental design, please refer to Dworkin and Gibson (2006).

122

123 Insertional mutations were selected from the Bloomington Stock Center and subsequently introgressed into  
124 two wild-type lab strains, Samarkand (Sam) and Oregon-R (Ore). Introgressions were performed by  
125 repeated backcrossing of females bearing the insertion to males of Sam and Ore-R. Females from replicate  
126 vials within each generation were pooled for the subsequent generation of backcrossing. Since both  
127 backgrounds contain a copy of the mini-white transgene, eye color for all flies lacking p-elements was  
128 white. Selection was therefore based entirely on the presence of the eye color marker, precluding unwitting  
129 selection for wing phenotypes. While the introgression procedure (14 generations of backcrossing) should  
130 make the genome of the mutant largely identical to that of the isogenic wild types, some allelic variation in  
131 linkage disequilibrium with the insertional element may remain. All experimental comparisons of mutant  
132 individuals were therefore made with wild-type siblings from a given cross and should share any remaining  
133 segregating alleles unlinked to the p-element. We separated mutants and their wild-type siblings by their  
134 corresponding mutant “line” number (supplementary Table 1) to avoid these and potential “vial effects”.  
135 All crosses were performed using standard media, in a 25°C incubator on a 12/12-hr light/dark cycle.

136

137 Two vials for each line were set up carefully to result in low to moderate larval density. The temperature of  
138 the incubator was monitored cautiously for fluctuations, and vial position was randomized daily to reduce  
139 any edge effects. After eclosion and sclerotization, flies from each cross were then separated into mutant  
140 and wild type individuals—those with and without the p-element-induced mutations, respectively—based  
141 on eye color and stored in 70% ethanol. A single wing from each fly was dissected and mounted in glycerol  
142 (see supplementary table 1B for sample sizes). Images of the wings were captured using a SPOT camera  
143 mounted on a Nikon Eclipse microscope. Landmarks (as shown in Figure 1) were digitized using tpsDig (v.  
144 1.39, Rohlf 2003) software.

145

146 Our analysis necessitated that there be flies from each representative treatment group; those lines with flies  
147 missing (e.g. from one background or sex) were left out of the analysis. Of the original 50, 42 lines were  
148 ultimately used.

149

150 ***Analysis of Sexual Size Dimorphism (SSD)***

151

152 Centroid size (i.e., the square root of the sum of the squared distances from each landmark to the centroid  
153 of the configuration) was used as the size variable in our analyses. Individual size values for male and  
154 female within each line and background were taken from the coefficients of a linear model where centroid  
155 size was modeled as a function of genotype, sex and their interaction.

156

157 SSD was then calculated based on a common index, wherein the dimorphism is represented as the  
158 proportion of female size to male size (Lovich & Gibbons 1992; Smith 1999):

159

160 
$$\frac{size_F}{size_M} - 1$$

161

162 The resulting index represents the relative size difference between males and females where 0 indicates a  
163 complete lack of dimorphism and 1 indicates that females are 100% larger than males. Negative values  
164 represent male-biased dimorphism.

165

## 166 *Analysis of Sexual Shape Dimorphism (SShD)*

167

168 Generalized Procrustes Analysis (GPA) was used to super-impose landmark configurations after correcting  
169 for position and scaling each configuration by its centroid size. This procedure removes non-shape  
170 variation from the data—size, orientation and position. From the nine two dimensional landmarks, we are  
171 left with 14 dimensions of variation, and thus applied a Principal Components Analysis (PCA) to the  
172 Procrustes coordinates (i.e., the shape coordinates after GPA) and the first 14 PC scores were used as shape  
173 variables in subsequent shape analyses.

174

175 Two different shape scores were used in this study: one to examine sexual shape dimorphism and one to  
176 assess the strength of the allometric relationship of shape on size. First, SShD was estimated using the  
177 tangent approximation for Procrustes distance (i.e. Euclidian distance) between the average of male and  
178 female wing shape for a given treatment. Additionally, we calculated shape scores from the multivariate  
179 regression of shape onto size based on Drake and Klingenberg (2008). Specifically we projected the  
180 observed shape data onto the (unit) vector of regression coefficients from the aforementioned multivariate  
181 regression. We used these shape scores and regressed them onto centroid size to approximate allometric  
182 relationships. Confidence intervals for SSD and SShD as well as allometric coefficients were generated  
183 with random non-parametric bootstraps, using 1000 iterations.

184

185 All significance testing for the analyses involving shape data was done with Randomized Residual  
186 Permutation Procedure (RRPP) as implemented in the *geomorph* library in R. (Collyer et al. 2015). This  
187 method differs from the analyses in the original paper in two important ways. First, the linear model is  
188 based upon Procrustes distances, and second the resampling procedure more easily enables inferences  
189 within nested models (Collyer et al. 2015) with interaction terms. Specifically, this approach samples  
190 (without replacement), the residuals from the “simple” model under comparison, adding these to fitted  
191 values, and refitting under the “complex” model. We used the following models to assess the difference in  
192 shape dimorphism for each line and wild type background:

193

194 *Model1: Shape ~ Sex + Genotype*

195 *Model2: Shape ~ Sex + Genotype + Sex:Genotype*

196

197 We then performed such analysis for increasing degrees of interactions for the influence of sex, genotype,  
198 genetic background and size (for models of shape variables).

199

200 SShD was calculated with one of two methods: the advanced.procD.lm() function in the *geomorph* package  
201 (v.2.1.8) in R (v. 3.2.2) and standard Euclidean distances among treatment groups using the lm() function;  
202 both approaches yielded equivalent results. To evaluate the mean shape difference caused by sex, we used  
203 linear models based upon Procrustes distance (with RRPP) to compare models where sex is and is not a  
204 predictor of shape using the procD.lm and advanced.procD.lm functions in *geomorph*. These analyses were  
205 randomized (by individual) and repeated 1000 times per treatment group to assess whether the magnitude  
206 of effect was greater than expected by chance.

207

208 Despite having separate and independent “control” (wild type) lineages for each cross (to control for any  
209 potential vial effects or residual segregating variation), we utilized a sequential Bonferroni correction to  
210 maintain our “experiment-wide” nominal alpha of 0.05. Given the large number of comparisons being  
211 made, it is likely that this will yield extremely conservative results, and we expect this underestimates the  
212 number of mutations that influence sexual dimorphism or mutational effects of allometry of shape on size.

213

## 214 *Vector Correlations*

215

216 While the above linear model assesses the magnitude of the effects, for shape it is also important to  
217 examine the direction of effects. Specifically, whether the mutations influenced the direction of SShD. To  
218 examine this, the vector of SShD was calculated within each genotypic group (wild type VS. mutant). We  
219 then estimated the vector correlation between the vectors of SShD for the wild type and mutant as follows:

220

221

222

$$r_{VC} = \frac{|SShD_{wt} \cdot SShD_{mt}|}{\|SShD_{wt}\| \times \|SShD_{mt}\|}$$

223

224

225

226

227

228

229

230

231

### *Statistical Analysis*

232

233

234

235

236

237

238

All statistical analyses were conducted using R statistical software (version 3.2.2). Significance testing (specifically those involving RRPP) was conducted using functions within the *geomorph* package (v. 2.1.8) and with custom functions. All error bars are 95% Confidence intervals generated by non-parametric bootstraps. All scripts including custom functions are available on github (<https://github.com/DworkinLab/TestaDworkin2016DGE>).

238 **Results:**

239

240 ***Different wild type strains vary for Sexual Size Dimorphism (SSD) and Sexual Shape Dimorphism***  
241 ***(SShD) in wing morphology, for both direction and magnitude.***

242

243 As each mutation was repeatedly backcrossed into two distinct wild type strains—Oregon-R (Ore) and  
244 Samarkand (Sam)—we first examined patterns of sexual size and shape dimorphism between these two  
245 strains.

246

247 We observed considerable, and highly significant, differences in both SSD and magnitude of SShD  
248 between the wild type strains (Fig.1A). Further, with respect to the vector of SShD, both wild-type  
249 backgrounds were somewhat divergent (Fig.1B). The computed vector correlation for SShD between both  
250 backgrounds falls within the same range as those calculated for SShD by genotype (0.937, 95% CI 0.92, -  
251 0.95), suggesting only subtle changes in direction. Additionally, the allometric relationship between shape  
252 and size differs between the two wild type backgrounds. While Ore has a stronger overall slope than Sam,  
253 the magnitude of both males and females slopes are reversed by background; for females, shape has  
254 stronger association with size relative to males in Ore (F 0.113, 95% CI 0.105, 0.122; M 0.099, 95% CI  
255 0.091, 0.107), whereas the opposite is true for Sam (F 0.105, 95% CI 0.097, 0.113; M 0.120, 95% CI  
256 0.112, 0.129). These differences in size, shape and allometry are all significant based on the randomized  
257 resampling permutation procedure (see methods).

258

259 Despite tight control of experimental variables (food, temperature) we observed a surprising amount of  
260 residual environmental variation for SSD and SShD among each replicate of the two wild type lineages. In  
261 the design of the experiment, where for each mutation, within each background, wild-type controls were  
262 generated from the cross that shared the environment (vials) with their otherwise co-isogenic mutant  
263 sibling. As all of these offspring across the vials are genetically co-isogenic, and only differ in the subtle  
264 aspects of rearing environment across vials, this allows us to assess some aspects of how environmental  
265 variation influences SSD and SShD. As shown in Figure 1A, in addition to differences between the two  
266 wild type strains for SSD and SShD, there is also variation around the mean estimates for each. Since each  
267 data point in Figure 1A corresponds to each mutant's wild-type siblings from a given cross, these points  
268 largely reflect variation among “vial” effects. Indeed, models based on Procrustes distance suggest that  
269 there are significant vial effects ( $P = 0.009$ ) and vial by sex ( $P = 0.001$ ) even within the background control  
270 populations, which are largely attributable to micro-environmental variation. This is somewhat surprising  
271 as external sources of variation such as food (all from a common batch) and rearing temperature (all vials  
272 reared in a common incubator, with daily rotation of vials to minimize edge effects) were highly controlled  
273 in the experiment. This suggests that the magnitude of SSD and SShD for wing form is influenced by subtle  
274 environmental changes, suggesting that high levels of replication to control for these factors is generally  
275 necessary.

276

277 ***Despite many mutations having substantial effects on overall shape, a relatively small number influence***  
278 ***SSD and SShD.***

279

280 As demonstrated in the original study (Dworkin & Gibson 2006) and confirmed here, the vast majority of  
281 mutations have a significant influence on shape when measured in the heterozygous state (supplementary  
282 table 1). Of the subset of 42 mutations used in the current study (from the original 50), all but 10 had a  
283 significant effect for genotype (most surviving even a conservative Bonferroni correction) using the  
284 Residual permutation (Collyer et al. 2015). Of those 10, most had significant genotype-by-background  
285 effects, consistent with the earlier study (despite a different underlying inferential approach). Despite this,  
286 only 18 of the mutations showed evidence for “significant” sex-limited genotypic effects (based on the sex-  
287 by-genotype effects), of which 2 survived sequential Bonferroni correction. Additionally, another 12 show  
288 evidence for significant effects of sex-by-genotype in combination with other factors in the model (size  
289 and/or background). Only one of these 12 survived correction for multiple comparisons. While inferences  
290 based on significance alone is quite limited (see below), these results suggest that only a small subset of  
291 mutations appear to have sex-limited influences on shape (Table 1).

292



293 To understand these results more fully, we next focused on the magnitudes of SShD and the SSD index,  
294 using non-parametric bootstraps to generate confidence intervals on our estimates. We performed the  
295 analyses separately for each wild type genetic background given that they can differ for both magnitude  
296 and direction of SShD. As shown in Fig.2, while several mutants show significant effects for either SSD,  
297 SShD or both in one or both of the backgrounds, the magnitudes of these effects are small, especially  
298 considering the relatively large amount of environmental variation in SSD and SShD observed within  
299 strains (Fig.1A). Interestingly, while only a few mutations showed evidence for an overall effect on size,  
300 these tend to have sex-limited effects (Fig.2).

301  
302 In addition to examining the magnitude of effects, we also examined the direction of effects, and whether  
303 the mutations substantially changed the direction of SShD relative to their co-isogenic wild type. As shown  
304 in Fig.3, the mutations examined in this study generally do not substantially influence the direction of  
305 SShD, with several notable exceptions such as the mutation in the *Omb* gene, as well as more subtle effects  
306 from mutations such as *sax*, *pnt*, *drk* (among others). Even when the bootstrap confidence intervals do not  
307 approach 1, the estimated vector correlation are still generally greater than ~0.9, suggesting only modest  
308 changes in the direction of SShD.

### 309 ***Mutations do not substantially alter directions of SShD, nor patterns of allometry.***

310  
311 One important aspect of assessing variation in shape, and in particular in situations where there is either (or  
312 both) SSD or SShD, is to account for the allometric effects of size on shape when computing the magnitude  
313 and direction of SShD. One important approach is to assume a common allometric relationship between  
314 size and shape across the sexes (after adjusting for mean differences in size and shape), and regressing out  
315 the effects of size. Then using either the residuals or predicted values of shape (after accounting for size) to  
316 compute an “allometry corrected” measure of SShD (Gidaszewski et al. 2009). To utilize such an approach  
317 requires that the assumption of a common allometric relationship be valid, as has been observed across  
318 *Drosophila* species for the wing shape and size relationship (Gidaszewski et al. 2009).

319  
320 Prior to computing the allometry-corrected measure we examined this assumption among the mutations  
321 used in this study. Of the 42 independent mutations (with their independent controls), 13 had a significant  
322 interaction of sex-by-size on the influence of shape (with 3 surviving the sequential Bonferroni correction).  
323 Another 8 of them had a sex-by-size interaction imbedded within a higher-order interaction term. Despite  
324 this the overall magnitudes of effects and directions of allometric relationships appear to be highly similar,  
325 with a few important exceptions (Fig.4). Thus it is unclear whether using an allometry-free correction is  
326 warranted within the context of this study. It is worth noting that making the assumption of a shared  
327 allometric relationship, and computing the allometry-corrected measure of SShD did not substantially alter  
328 our findings (Supplementary Figure 1; Supplementary Table 2).  
329



## 330 Discussion

331  
332 While previously underappreciated, it is clear that mutations in genes in several growth factor pathways can  
333 act in a sex-specific manner. Of the 42 mutations analyzed, 12 had a significant sex-by-genotype  
334 interaction on size, shape or both (Fig.2). Only a few mutant alleles had the ability to affect the sexual  
335 dimorphism in allometry, the relationship between shape and size (Fig.4). Furthermore, nearly all of the  
336 mutants appear to act in a background-dependent manner, affecting shape or size in one genotype, but not  
337 the other (Figure 2).

338  
339 Previous research has demonstrated the ability of growth pathways to respond to various perturbations,  
340 including: individual mutation (Palsson & Gibson 2004; Gao & Pan 2001; Tatar et al. 2001), genetic  
341 background (Chandler et al. 2013; Dworkin & Gibson 2006; Paaby & Rockman 2014) and environment  
342 (Ghosh et al. 2013; Shingleton et al. 2009; de Moed et al. 1997). Our results are unique in that they allow  
343 us to directly assess the effects of these perturbations on relative growth based on sex for both direction and  
344 magnitude. Relative differences between male and female growth patterns due to these mutations are  
345 ultimately responsible for the generation of SSD and/or SShD.

### 346 *The importance of multiple independent control lineages*

347  
348 As expected, different wild type strains vary in magnitude and direction of effects for SSD and SShD  
349 (Figure 1). The Oregon-R wild type background displays greater dimorphism in both size and shape  
350 compared to Sam. Implicit in our results is the understanding that genetic background itself has a profound  
351 effect on the underlying wild-type growth pathways and all of the downstream consequences this can have.  
352

353  
354 Somewhat more surprising is that both SSD and SShD appear quite environmentally sensitive (despite the  
355 genotypic effects being relatively insensitive based on our previous work). While great care was taken to  
356 reduce the effects of microclimactic variation, edge effects, nutritional variation and even genotypic  
357 variation, our results demonstrate that size and shape dimorphism remain highly variable (Figure 1).

358  
359 There always remains the possibility that environmental variation does not entirely account for the wild-  
360 type variation observed. For each backcrossed line, a small amount of genetic information surrounding  
361 each p-element insertion site is unavoidable, especially during recombination in final cross with mutants  
362 and wild-types. This effect is somewhat unlikely, however, due to the fact that these recombination events  
363 are rare and affect only single measured individuals. Regardless, such a large amount of variation in trait  
364 values within “isogenic” lines is unexpected. Most studies attribute any such variation within genetically  
365 (and environmentally) identical lines to stochastic variation in gene expression (Rea et al. 2005; Kirkwood  
366 et al. 2005; Raj & van Oudenaarden 2008). Such claims are, however, outside of the scope of our current  
367 study.

### 368 *Rare sex-limited effects on wing form among mutations in EGFR and TGF- $\beta$ signaling*

369  
370 While much is known about the development of wing size and shape (Shingleton et al. 2005; García-  
371 Bellido et al. 1994; Weinkove et al. 1999; Day & Lawrence 2000; Prober & Edgar 2000), comparatively  
372 little is known about the sex-specific effects of the genes involved (Horabin 2005; Abbott et al. 2010;  
373 Gidaszewski et al. 2009). While these mutations represent only a subset of the almost innumerable potential  
374 mutations within and among genes, they serve as a lens through which we can view the sex-limited effects  
375 of mutations. It is now clear that only a handful of genes associated with growth may be acting in a sex-  
376 dependent manner. Indeed, these results call for a further investigation of the formerly understudied sex-  
377 effects of growth pathways.

378  
379 One such study confirms a link between many of the patterning mutations used in the current study and the  
380 development of SSD in the wing (Horabin 2005). In her 2005 paper, Horabin demonstrated that  
381 components of the sex-determination pathway (specifically, *Sxl*) were responsible for activating size-  
382 regulating genes within the Hedgehog signaling pathway. In fact, of the handful of genes to display sex-  
383 limited effects on SSD or SShD, a few were associated with this pathway, including: *Omb*, *dad* and *Dpp*  
384 (Horabin 2005; Abu-Shaar & Mann 1998). This does not appear to be coincidence as these are the only  
385

386 mutants in this pathway that we utilized for this study. Since these mutants only represent a subset of those  
387 with sex-limiting effects, we cannot assign causality to this pathway. Instead, this demonstrates that sex-  
388 limiting effects of genes interact with more complexity than previously understood; no one pathway  
389 appears to be acting in a sex-dependent manner to generate shape/size.

390  
391 Another candidate pathway involved in the generation of SSD is the Insulin and Insulin-like growth factor  
392 (IIS)/Target of Rapamycin (TOR) pathway. Evidence suggests that components of this pathway, such as  
393 *InR* (Testa et al. 2013; Shingleton et al. 2005) and *foxo* (Carreira et al. 2011) can contribute to SSD and/or  
394 SShD.

395  
396 Further studies, such as Takahashi & Blanckenhorn (2015) have found that most mutations appear to  
397 decrease the SSD of wing form. Our data appear to yield an interesting trend for the direction of SSD based  
398 on genetic background. Ostensibly, growth-pathway mutants in the Ore wild type background tend to  
399 decrease SSD, whereas mutants that affect SSD in Sam tend to increase it. At this point it is impossible to  
400 say if this trend is biologically meaningful, but given that Ore has a greater underlying magnitude of SSD  
401 (and is already in conflict with Rensch's rule), these mutations may be interfering with genetic mechanisms  
402 influencing sexual dimorphism in the Ore background.

403  
404 Our data is somewhat inconsistent with the findings of another previous mutation screen study, namely  
405 those of Carreira et al. (2011), wherein the authors found a much greater proportion of random insertion  
406 mutations appeared to have sex-specific effects on wing shape. The reasons for this are as of yet unclear,  
407 but may reflect methodology, magnitude of mutational effects used or that in the current study all mutations  
408 were limited to two signaling pathways. First, our methods allowed us to effectively tease apart the sex-  
409 limited interactions of sex for each genotype pair by plotting them in a size-shape space. Second, the  
410 authors used a different wild type genetic background than either that were used in this study (Canton-S). It  
411 is clear from this study and others (Dworkin & Gibson 2006; Chandler et al. 2013) that genetic background  
412 has an appreciable effect on gene function. At least part of the variation in the number of genes affecting  
413 wing SSD must necessarily be due to genetic background effects; however, genetic background effects  
414 cannot wholly account for the differences observed. Third, we cannot rule out the effects of dominance  
415 when discussing the effects of gene function. The genotype of flies in the study by Carreira et al. (2011)  
416 was homozygous for all mutants used. Their lines were chosen specifically for their non-lethal homozygous  
417 phenotype, whereas mutation used in our study were chosen irrespective of lethality. Because of this, our  
418 flies necessarily had to be heterozygous in order to avoid lethality associated with the homozygous  
419 phenotype. Perhaps not all loss-of-function mutants within our study were sufficient to alter the phenotype  
420 in a sex-limited manner. Finally, because our mutants were deliberately selected based on their association  
421 with wing shape morphogenesis, our results are not strictly comparable to those of Carreira et al. (2011).

#### 422 423 ***Disentangling mutant-phenotype relationships*** 424

425 Our findings suggest that in most cases when a mutational analysis is performed to understand the genetic  
426 architecture of SSD or SShD, it is important to assess whether the mutation is only affecting SSD/SShD or  
427 whether it is instead demonstrating some degree of sex-biased influence. Many genes may therefore appear  
428 to alter SSD/SShD, but are instead only affected by sex as one of several variables of its expression. This  
429 may seem like an arbitrary distinction, but it is important if we are to fully understand the genetic  
430 underpinnings of complex phenotypes. Many mutants, such as those in the EGFR signaling pathway used  
431 here, are either lethal or at least partially ablate development of certain organs as homozygotes, indicating  
432 that these genes are necessary for the development of the organ itself. If heterozygotes have sex-specific  
433 effects on size or shape, we cannot necessarily conclude that this gene affects SSD or SShD, but rather that  
434 the gene is important for formation of an organ and has sex-dependent effects. Only in the case of genes  
435 such as *Mafl*, a gene that has been demonstrated to directly effect SSD in *Drosophila* (Rideout et al. 2012),  
436 can we conclude that said gene is affecting SSD and not simply acting in a sex-limited manner.

437  
438 To fully understand the scope of SSD and SShD, one must precisely define what is meant by size and  
439 shape. While the definition of size is relatively straightforward to interpret, shape is somewhat more  
440 nuanced. For many organs, shape can essentially be broken down into the relative size of component parts  
441 of the larger structure (given that all aspects are homologous). For instance, during development in

442 *Drosophila* there are multiple quadrants of the developing wing imaginal disc whose individual sections  
443 may grow more or less in relation to the others, thus altering the “shape” of the wing. Mutant phenotypes  
444 may manifest as changes to large sections, such as a widening of the entire central portion of the wing (*Ptc*)  
445 or they may be subtler in effect, altering the placement of only a single crossvein (*cv-2*) (Dworkin &  
446 Gibson 2006). While these mutants may have local effects on size, such that they alter shape, what is less  
447 clear is whether these mutants are affecting size in a localized manner or the actual shape itself.

448  
449 The effects of each pathway appear relatively consistent despite differences in genetic background. While  
450 mutations within the *Egfr* pathway tended to affect primarily SShD, those in the TGF- $\beta$  pathway had a  
451 more mixed effect (more frequently affecting SSD). This pattern suggests that genetic background may  
452 only alter a mutation’s quantitative effect, rather than its qualitative effect.

453  
454 Ultimately, our results demonstrate the importance of distinguishing between the relative contributions of  
455 each mutation to sexual dimorphism for shape, size or both. Of those mutants with sex-limited effects, even  
456 fewer exclusively affect either shape or size dimorphism (Fig.2). While some studies have been successful  
457 in artificially altering SSD of specific traits through selection (Bird & Schaffer 1972; Emlen et al. 2005;  
458 Reeve & Fairbairn 1996), it is unclear whether whole trait size or simply trait shape (e.g. length) has been  
459 altered. Our results demonstrate the need to exercise caution when discussing the effect of mutants on size  
460 or shape dimorphism.

#### 461 462 *Reassessing the assumption of common allometry*

463  
464 One important method for quantifying “shape” changes involves examining allometric relationships,  
465 specifically static allometry, which is the relationship among adult individuals between body size and organ  
466 size (Huxley 1932; Stern & Emlen 1999). In fact, one of the most obvious way that males and females can  
467 differ is through differences in scaling relationships between body parts; these encompass some of the most  
468 obvious sources of variation in the natural world (Bonduriansky & Day 2003; Shingleton et al. 2009). By  
469 studying the relationship between two traits (e.g. body vs organ size), we can glean important information  
470 about the relative growth of traits and, therefore, the underlying mechanisms of differences in the growth of  
471 these traits. Consequently, allometry is an important tool for biologists to assess differences in size and  
472 shape dimorphism within (and across) a species. Our results support the claim for the importance of  
473 studying allometry by demonstrating that, while some mutants may have sex-limited effects on shape  
474 and/or size dimorphism (Fig.2), they do not necessarily effect the relationship between trait shape and size  
475 (Fig.4). Many mutants cause significant differences in sexual dimorphism of allometry, but do not  
476 necessarily alter SSD or SShD. These results may seem counterintuitive, but it is important to remember  
477 that, while changes in SSD or SShD may shift the direction of slope of allometry along one or more  
478 dimensions (in shape space), this does not necessarily alter the allometric slope itself (Frankino et al. 2005).

479  
480 Since D’Arcy Thompson (1917) outlined his approach of how relative changes in body and organ size can  
481 be mapped out onto Cartesian coordinates to visualize relative growth, the study of allometry and shape  
482 have been closely linked. Modern approaches use similar, albeit much more complicated methods to assess  
483 changes in relative landmark positions (Sanger et al. 2013; van der Linde & Houle 2009; Abbott et al.  
484 2010). Ostensibly, one of the downfalls of shape analysis is that shape inherently carries information about  
485 its underlying relationship to size, despite the fact that geometric morphometric analyses partially separates  
486 it from shape (Gidaszewski et al. 2009; Mosimann 1970; Gould 1966; Nevill et al. 1995). More  
487 specifically, size itself is a measurement based on some aspect of shape. If size and shape do not scale  
488 isometrically (such that unit increase in size is accompanied by an equal increase in shape), then the  
489 underlying co-variation will be reflected in estimates of shape that are disproportionately affected by size  
490 (Mosimann 1970). This issue is implicit in the geometry of shapes themselves; as absolute size increases,  
491 surface area to volume ratios decrease (Gould 1966). This is particularly bad news for studies wishing to  
492 analyze induced changes in shape and size, because it means that the degree of independence between these  
493 two variables may be difficult to infer. However, by plotting size on shape and using the residuals from this  
494 model, Gidaszewski et al. (2009) were able to effectively eliminate the issue of non-independence with size  
495 and shape. These residuals represent the total variation in shape that is not due to allometric effects of size.

496

497 Allometric patterns of variation across sex and genotype are necessarily more complicated. While it is  
498 known that shape (and shape dimorphism) is strongly influenced by its relationship with size, it is not  
499 always clear that the assumption of a common allometric relationship across sexes is met. Previous studies  
500 examining patterns of SSD and SShD (Gidaszewski et al. 2009) generally made the assumption of a  
501 common allometric relationship between males and females within each *Drosophila* species. This was  
502 despite their analysis suggesting that this assumption may not hold for all species. For the data we  
503 examined here, we could reject this assumption based on inferences based on statistical significance. Yet, it  
504 is clear that the magnitude of such differences were small, and allometric relationships were similar in most  
505 cases. Indeed, the allometric influence of size on shape appears to be largely consistent with respect to  
506 direction of effects, with a few notable exceptions (Fig.4). Regardless, we erred on the side of caution with  
507 this matter and decided to eschew analysis of SSD and SShD under assumption of common allometry. It is  
508 worth noting that the assumption of common allometry did not substantially alter the observed results  
509 (Supplementary Figure 1). As with other studies, we suggest that a rejection of this assumption simply  
510 based upon significance may not be optimal, and future work should determine what the consequences of  
511 making such assumptions might be for studies of sexual dimorphism and allometry.

512  
513 Our results clearly demonstrate the effects of growth pathway mutants on SSD and SShD. Most notably,  
514 we cannot rule out the sex-specific effects of any genes involved in growth. Our results demonstrate the  
515 current lack of understanding of how growth-related genes interact with the sex of the individual. By  
516 visualizing the effects of each mutation within the framework of size/shape space we gain a previously  
517 unrealized understanding of the role each mutant plays in generating a sex's phenotype. While this method  
518 is especially powerful for studying sexual dimorphism, its applications are not restricted to it. We therefore  
519 present this method as a means for dissecting the contributions of mutants to the development of size and  
520 shape.

521  
522 ***Acknowledgements***

523 We would like to thank Dr. William Pitchers for providing us with R scripts that facilitated the analysis.

524  
525 ***Funding:*** This work was supported by NIH grant 1R01GM094424-01 and an NSERC Discovery award to  
526 ID.

527  
528 ***Conflict of Interest:*** The authors declare that they have no conflict of interest.

529 **References Cited:**

530

531 Abbott, J.K., Bedhomme, S. & Chippindale, A.K., 2010. Sexual conflict in wing size and shape in  
532 *Drosophila melanogaster*. *Journal of evolutionary biology*, 23(9), pp.1989–97. Available at:  
533 <http://www.ncbi.nlm.nih.gov/pubmed/20695965>.

534 Abu-Shaar, M. & Mann, R.S., 1998. Generation of multiple antagonistic domains along the proximodistal  
535 axis during *Drosophila* leg development. *Development (Cambridge, England)*, 125(19), pp.3821–30.  
536 Available at: <http://www.ncbi.nlm.nih.gov/pubmed/9729490>.

537 Allen, C.E., Zwaan, B.J. & Brakefield, P.M., 2011. Evolution of sexual dimorphism in the Lepidoptera.  
538 *Annual review of entomology*, 56, pp.445–464. Available at:  
539 <http://www.ncbi.nlm.nih.gov/pubmed/20822452>.

540 Bird, M.A. & Schaffer, H.E., 1972. A study of the genetic basis of the sexual dimorphism for wing length  
541 in *Drosophila melanogaster*. *Genetics*, 72(3), pp.475–487.

542 Blanckenhorn, W.U. et al., 2007. Proximate Causes of Rensch's Rule: Does Sexual Size Dimorphism in  
543 Arthropods Result from Sex Differences in Development Time? *The American Naturalist*, 169(2),  
544 pp.245–57.

545 Bolstad, G.H. et al., 2015. Complex constraints on allometry revealed by artificial selection on the wing of  
546 *Drosophila melanogaster*. *Proceedings of the National Academy of Sciences*, 112(43), p.201505357.  
547 Available at: <http://www.pnas.org/lookup/doi/10.1073/pnas.1505357112>.

548 Bonduriansky, R., 2007. Sexual selection and allometry: a critical reappraisal of the evidence and ideas.  
549 *Evolution; international journal of organic evolution*, 61(4), pp.838–49. Available at:  
550 <http://www.ncbi.nlm.nih.gov/pubmed/17439616>.

551 Bonduriansky, R. & Chenoweth, S.F., 2009. Intralocus sexual conflict. *Trends in ecology & evolution*,  
552 24(5), pp.280–8. Available at: <http://www.ncbi.nlm.nih.gov/pubmed/19307043>.

553 Bonduriansky, R. & Day, T., 2003. The evolution of static allometry in sexually selected traits. *Evolution*,  
554 57(11), pp.2450–8. Available at: <http://www.ncbi.nlm.nih.gov/pubmed/14686522>.

555 Carreira, V.P. et al., 2011. Genetic basis of wing morphogenesis in *Drosophila*: sexual dimorphism and  
556 non-allometric effects of shape variation. *BMC developmental biology*, 11(1), p.32. Available at:  
557 [http://www.pubmedcentral.nih.gov/articlerender.fcgi?artid=3129315&tool=pmcentrez&rendertype=](http://www.pubmedcentral.nih.gov/articlerender.fcgi?artid=3129315&tool=pmcentrez&rendertype=abstract)  
558 [abstract](http://www.pubmedcentral.nih.gov/articlerender.fcgi?artid=3129315&tool=pmcentrez&rendertype=abstract).

559 Chandler, C.H., Chari, S. & Dworkin, I., 2013. Does your gene need a background check? How genetic  
560 background impacts the analysis of mutations, genes, and evolution. *Trends in Genetics*, 29(6),  
561 pp.358–366. Available at: <http://linkinghub.elsevier.com/retrieve/pii/S0168952513000218>.

562 Collyer, M.L., Sekora, D.J. & Adams, D.C., 2015. A method for analysis of phenotypic change for  
563 phenotypes described by high-dimensional data. *Heredity*, 115(4), pp.357–365. Available at:  
564 <http://www.nature.com/doifinder/10.1038/hdy.2014.75>.

565 Cox, R.M. & Calsbeek, R., 2010. Sex-specific selection and intraspecific variation in sexual size  
566 dimorphism. *Evolution; international journal of organic evolution*, 64(3), pp.798–809. Available at:  
567 <http://www.ncbi.nlm.nih.gov/pubmed/19796147>.

568 David, J.R. et al., 2003. Genetic variability of sexual size dimorphism in a natural population of *Drosophila*  
569 *melanogaster*: an isofemale-line approach. *Journal of genetics*, 82(3), pp.79–88. Available at:  
570 <http://www.ncbi.nlm.nih.gov/pubmed/15133187>.

571 Day, S.J. & Lawrence, P.A., 2000. Measuring dimensions: the regulation of size and shape. *Development*  
572 *(Cambridge, England)*, 127(14), pp.2977–87. Available at:  
573 <http://www.ncbi.nlm.nih.gov/pubmed/10862736>.

574 Drake, A.G. & Klingenberg, C.P., 2008. The pace of morphological change: historical transformation of  
575 skull shape in St Bernard dogs. *Proceedings. Biological sciences / The Royal Society*, 275(1630),



- 576 pp.71–76.
- 577 Dworkin, I. & Gibson, G., 2006. Epidermal growth factor receptor and transforming growth factor-beta  
578 signaling contributes to variation for wing shape in *Drosophila melanogaster*. *Genetics*, 173(3),  
579 pp.1417–1431.
- 580 Emlen, D.J., Hunt, J. & Simmons, L.W., 2005. Evolution of Sexual Dimorphism and Male Dimorphism in  
581 the Expression of Beetle Horns: Phylogenetic Evidence for Modularity, Evolutionary Lability, and  
582 Constraint. *The American Naturalist*, 166(4), pp.42–68. Available at:  
583 <http://www.ncbi.nlm.nih.gov/pubmed/16224711>.
- 584 Fairbairn, D.J., 2005. Allometry for Sexual Size Dimorphism: Testing Two Hypotheses for Rensch's Rule  
585 in the Water Strider *Aquarius remigis*. *The American Naturalist*, 166(4), pp.69–84. Available at:  
586 <http://www.ncbi.nlm.nih.gov/pubmed/16224713>.
- 587 Fairbairn, D.J., 1990. Factors Influencing Sexual Size Dimorphism in Temperate Waterstriders. *American*  
588 *Naturalist*, 136(1), pp.61–86.
- 589 Fairbairn, D.J. & Blanckenhorn, W.U., 2007. Sex, size, and gender roles: evolutionary studies of sexual  
590 size dimorphism, Oxford University Press.
- 591 Fairbairn, D.J. & Roff, D.A., 2006. The quantitative genetics of sexual dimorphism: assessing the  
592 importance of sex-linkage. *Heredity*, 97(5), pp.319–328.
- 593 Ferguson I.M. & Fairbairn D.J., 2000. Sex-specific selection and sexual size dimorphism in the waterstrider  
594 *Aquarius remigis*. *Journal Of Evolutionary Biology*, 13(2), pp.160–170.
- 595 Frankino, W.A. et al., 2005. Natural selection and developmental constraints in the evolution of  
596 allometries. *Science (New York, N.Y.)*, 307(5710), pp.718–20. Available at:  
597 <http://www.ncbi.nlm.nih.gov/pubmed/15692049>.
- 598 Gao, X. & Pan, D., 2001. *TSC1* and *TSC2* tumor suppressors antagonize insulin signaling in cell growth.  
599 *Genes & development*, 15(11), pp.1383–92. Available at:  
600 [http://www.pubmedcentral.nih.gov/articlerender.fcgi?artid=312704&tool=pmcentrez&rendertype=ab](http://www.pubmedcentral.nih.gov/articlerender.fcgi?artid=312704&tool=pmcentrez&rendertype=abstract)  
601 [stract](http://www.pubmedcentral.nih.gov/articlerender.fcgi?artid=312704&tool=pmcentrez&rendertype=abstract).
- 602 García-Bellido, A., Cortés, F. & Milán, M., 1994. Cell interactions in the control of size in *Drosophila*  
603 wings. *Proceedings of the National Academy of Sciences of the United States of America*, 91(21),  
604 pp.10222–6. Available at:  
605 [http://www.pubmedcentral.nih.gov/articlerender.fcgi?artid=44990&tool=pmcentrez&rendertype=abst](http://www.pubmedcentral.nih.gov/articlerender.fcgi?artid=44990&tool=pmcentrez&rendertype=abstract)  
606 [ract](http://www.pubmedcentral.nih.gov/articlerender.fcgi?artid=44990&tool=pmcentrez&rendertype=abstract).
- 607 Ghosh, S.M., Testa, N.D. & Shingleton, A.W., 2013. Temperature-size rule is mediated by thermal  
608 plasticity of critical size in *Drosophila melanogaster*. *Proceedings of the Royal Society B: Biological*  
609 *Sciences*, 280(1760), pp.20130174–20130174. Available at:  
610 <http://rspb.royalsocietypublishing.org/cgi/doi/10.1098/rspb.2013.0174>.
- 611 Gidaszewski, N.A., Baylac, M. & Klingenberg, C., 2009. Evolution of sexual dimorphism of wing shape in  
612 the *Drosophila melanogaster* subgroup. *BMC Evolutionary Biology*, 9(1), p.110. Available at:  
613 [http://www.pubmedcentral.nih.gov/articlerender.fcgi?artid=2691407&tool=pmcentrez&rendertype=a](http://www.pubmedcentral.nih.gov/articlerender.fcgi?artid=2691407&tool=pmcentrez&rendertype=abstract)  
614 [bstract](http://www.pubmedcentral.nih.gov/articlerender.fcgi?artid=2691407&tool=pmcentrez&rendertype=abstract).
- 615 Gould, S.J., 1966. Allometry and size in ontogeny and phylogeny. *Biological reviews of the Cambridge*  
616 *Philosophical Society*, 41(4), pp.587–640. Available at:  
617 <http://www.ncbi.nlm.nih.gov/pubmed/5342162>.
- 618 Hedrick, A.V. & Temeles, E.J., 1989. The evolution of sexual dimorphism in animals: Hypotheses and  
619 tests. *Trends In Ecology {&} Evolution*, 4(5), pp.136–138.
- 620 Horabin, J.I., 2005. Splitting the Hedgehog signal: sex and patterning in *Drosophila*. *Development*,  
621 132(21), pp.4801–10.

- 622 Huxley, J. 1932. Problems of relative growth. New York: Lincoln MacVeagh, The Dial Press.
- 623 Kijimoto, T., Moczek, A.P. & Andrews, J., 2012. Diversification of doublesex function underlies morph-,  
624 sex-, and species-specific development of beetle horns. *Proceedings of the National Academy of*  
625 *Sciences of the United States of America*, 109(50), pp.20526–31. Available at:  
626 [http://www.pubmedcentral.nih.gov/articlerender.fcgi?artid=3528601&tool=pmcentrez&rendertype=](http://www.pubmedcentral.nih.gov/articlerender.fcgi?artid=3528601&tool=pmcentrez&rendertype=abstract)  
627 [abstract](http://www.pubmedcentral.nih.gov/articlerender.fcgi?artid=3528601&tool=pmcentrez&rendertype=abstract).
- 628 Kirkwood, T.B.L. et al., 2005. What accounts for the wide variation in life span of genetically identical  
629 organisms reared in a constant environment? *Mechanisms of ageing and development*, 126(3),  
630 pp.439–43. Available at: <http://www.ncbi.nlm.nih.gov/pubmed/15664632>.
- 631 Lavine, L., Gotoh, H., Brent, C. S., Dworkin, I. & Emlen, D. J. Exaggerated Trait Growth in Insects. *Annu.*  
632 *Rev. Entomol.* **60**, 453–472 (2015).
- 633 van der Linde, K. & Houle, D., 2009. Inferring the Nature of Allometry from Geometric Data. *Evolutionary*  
634 *Biology*, 36(3), pp.311–322. Available at: <http://link.springer.com/10.1007/s11692-009-9061-z>.
- 635 Lovich, J.E. & Gibbons, J.W., 1992. A Review of Techniques Quantifying Sexual Size Dimorphism.  
636 *Growth, Development, and Aging*, 56, pp.269–281.
- 637 Mank, J.E., 2009. Sex Chromosomes and the Evolution of Sexual Dimorphism: Lessons from the Genome.  
638 *The American Naturalist*, 173(2), pp.141–150.
- 639 Merila, A.J. et al., 2011. Quantitative Genetics of Sexual Size Dimorphism in the Collared Flycatcher,  
640 *Ficedula albicollis*. *Society*, 52(3), pp.870–876.
- 641 de Moed, G.H., De Jong, G. & Scharloo, W., 1997. Environmental effects on body size variation in  
642 *Drosophila melanogaster* and its cellular basis. *Genetical research*, 70(1), pp.35–43. Available at:  
643 <http://www.ncbi.nlm.nih.gov/pubmed/9369097>.
- 644 Mosimann, J.E., 1970. Size Allometry: Size and Shape Variables with Characterizations of the Lognormal  
645 and Generalized Gamma Distributions. *Journal of the American Statistical Association*, 65(330),  
646 pp.930–945.
- 647 Nevill, A.M., Holder, R.L. & Alan, M., 1995. Scaling, normalizing and per ratio an allometric modeling  
648 approach standards: an allometric modeling approach. *Journal of Applied Physiology*, 79(3),  
649 pp.1027–1031.
- 650 Paaby, A.B. & Rockman, M. V., 2014. Cryptic genetic variation: evolution’s hidden substrate. *Nature*  
651 *Reviews Genetics*, 15(4), pp.247–258. Available at:  
652 <http://www.nature.com/doi/10.1038/nrg3688>.
- 653 Palsson, A. & Gibson, G., 2004. Association between nucleotide variation in *Egfr* and wing shape in  
654 *Drosophila melanogaster*. *Genetics*, 167(3), pp.1187–1198.
- 655 Prasad, N.G. et al., 2007. An evolutionary cost of separate genders revealed by male-limited evolution. *The*  
656 *American naturalist*, 169(1), pp.29–37. Available at:  
657 <http://www.ncbi.nlm.nih.gov/pubmed/17206582>.
- 658 Preziosi, R.F. & Fairbairn, D.J., 2000. Lifetime Selection on Adult Body Size and Components of Body  
659 Size in a Waterstrider: Opposing Selection and Maintenance of Sexual Size Dimorphism. *Evolution*,  
660 54(2), pp.558–566.
- 661 Prober, D.A. & Edgar, B.A., 2000. *Ras1* Promotes Cellular Growth in the *Drosophila* Wing. *Cell*, 100(4),  
662 pp.435–46.
- 663 Raj, A. & van Oudenaarden, A., 2008. Nature, nurture, or chance: stochastic gene expression and its  
664 consequences. *Cell*, 135(2), pp.216–26. Available at:  
665 <http://www.ncbi.nlm.nih.gov/pubmed/18957198>.
- 666 Rea, S.L. et al., 2005. A stress-sensitive reporter predicts longevity in isogenic populations of



- 667 *Caenorhabditis elegans*. *Nature genetics*, 37(8), pp.894–898.
- 668 Reeve, J.P. & Fairbairn, D.J., 1999. Change in sexual size dimorphism as a correlated response to selection  
669 on fecundity. *Heredity*, 83(6), pp.697–706. Available at:  
670 <http://www.ncbi.nlm.nih.gov/pubmed/10651914>.
- 671 Reeve, J.P. & Fairbairn, D.J., 2001. Predicting the evolution of sexual size dimorphism. *Journal of*  
672 *Evolutionary Biology*, 14(2), pp.244–254. Available at: [http://doi.wiley.com/10.1046/j.1420-](http://doi.wiley.com/10.1046/j.1420-9101.2001.00276.x)  
673 [9101.2001.00276.x](http://doi.wiley.com/10.1046/j.1420-9101.2001.00276.x).
- 674 Reeve, J.P. & Fairbairn, D.J., 1996. Sexual Size Dimorphism as a Correlated Response to Selection on  
675 Body Size: An Empirical Test of the Quantitative Genetic Model. *Society*, 50(5), pp.1927–1938.
- 676 Rideout, E.J., Marshall, L. & Grewal, S.S., 2012. *Drosophila* RNA polymerase III repressor *MafI* controls  
677 body size and developmental timing by modulating tRNA<sup>iMet</sup> synthesis and systemic insulin  
678 signaling. *Proceedings of the National Academy of Sciences of the United States of America*, 109(4),  
679 pp.1139–44.
- 680 Rohlf, F.J., 2003. TpsDig. <http://life.bio.sunysb.edu/morph/>
- 681 Sanger, T.J. et al., 2013. Convergent Evolution of Sexual Dimorphism in Skull Shape Using Distinct  
682 Developmental Strategies. *Evolution*, 67(8), pp.2180–2193. Available at:  
683 <http://doi.wiley.com/10.1111/evo.12100>.
- 684 Shine, R., 1989. Ecological Causes for the Evolution of Sexual Dimorphism: A Review of the Evidence on  
685 JSTOR. *Quarterly Review of Biology*, 64(4), pp.419–461. Available at:  
686 <http://www.jstor.org/stable/2830103>.
- 687 Shingleton, A.W. et al., 2009. Many ways to be small: different environmental regulators of size generate  
688 distinct scaling relationships in *Drosophila melanogaster*. *Proceedings. Biological sciences / The*  
689 *Royal Society*, 276(1667), pp.2625–33. Available at:  
690 [http://www.pubmedcentral.nih.gov/articlerender.fcgi?artid=2686648&tool=pmcentrez&rendertype=a](http://www.pubmedcentral.nih.gov/articlerender.fcgi?artid=2686648&tool=pmcentrez&rendertype=abstract)  
691 [bstract](http://www.pubmedcentral.nih.gov/articlerender.fcgi?artid=2686648&tool=pmcentrez&rendertype=abstract).
- 692 Shingleton, A.W. et al., 2005. The Temporal Requirements for Insulin Signaling During Development in  
693 *Drosophila*. *PLoS biology*, 3(9), p.e289.
- 694 Smith, R.J., 1999. Statistics of sexual size dimorphism. *Journal of Human Evolution*, 36(4), pp.423–458.  
695 Available at: <http://linkinghub.elsevier.com/retrieve/pii/S0047248498902810>.
- 696 Stern, D.L. & Emlen, D.J., 1999. The developmental basis for allometry in insects. *Development*  
697 *(Cambridge, England)*, 126(6), pp.1091–101. Available at:  
698 <http://www.ncbi.nlm.nih.gov/pubmed/10021329>.
- 699 Takahashi, K.H. & Blanckenhorn, W.U., 2015. Effect of genomic deficiencies on sexual size dimorphism  
700 through modification of developmental time in *Drosophila melanogaster*. *Heredity*, 115(2), pp.140–  
701 145. Available at: <http://www.nature.com/doi/10.1038/hdy.2015.1>.
- 702 Tatar, M. et al., 2001. A mutant *Drosophila* insulin receptor homolog that extends life-span and impairs  
703 neuroendocrine function. *Science (New York, N.Y.)*, 292(5514), pp.107–10. Available at:  
704 <http://www.ncbi.nlm.nih.gov/pubmed/11292875>.
- 705 Testa, N.D., Ghosh, S.M. & Shingleton, A.W., 2013. Sex-Specific Weight Loss Mediates Sexual Size  
706 Dimorphism in *Drosophila melanogaster*. F. Pichaud, ed. *PLoS ONE*, 8(3), p.e58936. Available at:  
707 <http://dx.plos.org/10.1371/journal.pone.0058936>.
- 708 Thompson, D.W., 1917. *On Growth and Form*, Cambridge: Cambridge University Press.
- 709 Weatherbee, S.D. et al., 1998. Ultrabithorax regulates genes at several levels of the wing-patterning  
710 hierarchy to shape the development of the *Drosophila* haltere. *Genes & Development*, 12(10),  
711 pp.1474–1482. Available at: <http://www.genesdev.org/cgi/doi/10.1101/gad.12.10.1474>.

- 712 Weber, K., 2005. Many P-Element Insertions Affect Wing Shape in *Drosophila melanogaster*. *Genetics*,  
713 169(3), pp.1461–1475. Available at: <http://www.genetics.org/cgi/doi/10.1534/genetics.104.027748>.
- 714 Weinkove, D. et al., 1999. Regulation of imaginal disc cell size, cell number and organ size by *Drosophila*  
715 class I(A) phosphoinositide 3-kinase and its adaptor. *Current biology: CB*, 9(18), pp.1019–29.  
716 Available at: <http://www.ncbi.nlm.nih.gov/pubmed/10508611>.
- 717
- 718

718 **Figure Legends:**

719

720 **Fig.1** Natural variation in SSD and SShD for two wild type strains. A) SSD and SShD in both wild type  
721 background strains are represented three ways: scatterplot (center), SSD histogram with density curve (x-  
722 axis, top) and SShD histogram with density curve (y-axis, right). Data points represent mean value for  
723 wild-type siblings of each heterozygous mutant cross from a given vial. The Samarkand wild type  
724 background has a wider range of SSD, encompassing the low end of the spectrum, whereas Oregon-R tends  
725 to be more consistently large in SSD. B) Average direction of SShD in a typical Samarkand (left) and  
726 Oregon-R (right) wild type wing. Landmark coordinates are mapped onto a typical wing to demonstrate  
727 shape. Arrows represent the vector of shape change (magnified 5x) from female to male wing shapes.  
728

729 **Fig.2** Magnitude of SSD and SShD for 42 mutants in Oregon-R (left) and Samarkand (right) wild type  
730 backgrounds. The effect of each mutant is mapped out in a size-and-shape dimorphism space. Genotypic  
731 means for each mutant are indicated by point style and connected by a solid line. SSD is plotted on each x-  
732 axis for all plots and SShD is displayed on the y-axis. The plots above display the entire range of variation  
733 observed, while those below display only the area with the highest density of points. Lines with significant  
734 sex-by-genotype effects are highlighted as follows: effect on both size and shape, shape only and size only.  
735 Only significant genes (after sequential Bonferroni correction) from the linear models are colored. Few  
736 mutations in this study alter sexual dimorphism of size or shape. In addition, the effect of mutations also  
737 appears to be highly background dependent, as only two lines, *Omb* and *Egfr*, were consistent in both  
738 backgrounds. Error bars are 95% confidence intervals (unadjusted alpha). All gene names are displayed  
739 lower-case, regardless of dominance.  
740

741 **Fig.3** Vector correlations to assess similarity of direction for sexual shape dimorphism (mutant VS. wild  
742 type) by background. While genetic background appears to have little effect on the direction of SShD for  
743 most mutations, several stand out with more divergent directions of SShD. Those mutations with large  
744 background effects are also notable for their large effect on size and/or shape. Error bars are 95%  
745 confidence intervals (unadjusted alpha).  
746

747

748 **Fig.4** Variation in the magnitude of association between shape and size allometric coefficients among  
749 mutations in the Oregon-R (top) and Samarkand (bottom) wild type backgrounds. The “slope” of the  
750 allometric relationship for shape on size is displayed by sex and genotype. The magnitude of allometric  
751 effects appears to be relatively stable across strains, with few mutants substantially altering the wild type  
752 pattern of allometric co-variation. Individual lines whose mutants cause a significant sex-by-size interaction  
753 are represented dark in contrast to non-significant (faded) lines. Error bars are 95% confidence intervals  
754 (unadjusted alpha) for each individual treatment; significance is assessed based solely the interaction terms  
755 from the multivariate linear models.  
756

757 **Supplementary Fig.1** Magnitude of SSD and SShD for 42 mutants in Oregon-R (left) and Samarkand  
758 (right) wild type backgrounds, after correcting for the influence of allometry (shape on size). A common  
759 allometry relationship was assumed across genotype and sex within each background and line combination.  
760 Residuals from the allometric model were then used for the analysis. This figure is otherwise identical to  
761 figure 2 (which does not correct for allometry). The effect of each mutant is mapped out in a size-and-shape  
762 dimorphism space. Genotypic means for each mutant are indicated by point style and connected by a solid  
763 line. SSD is plotted on each x-axis for all plots and SShD is displayed on the y-axis. The plots above  
764 display the entire range of variation observed, while those below display only the area with the highest  
765 density of points. Lines with significant sex-by-genotype effects are highlighted as follows: effect on both  
766 size and shape, shape only and size only. Only significant genes (after sequential Bonferroni correction)  
767 from the linear models are colored. Error bars are 95% confidence intervals (unadjusted alpha). All gene  
768 names are displayed lower-case, regardless of dominance.  
769

770

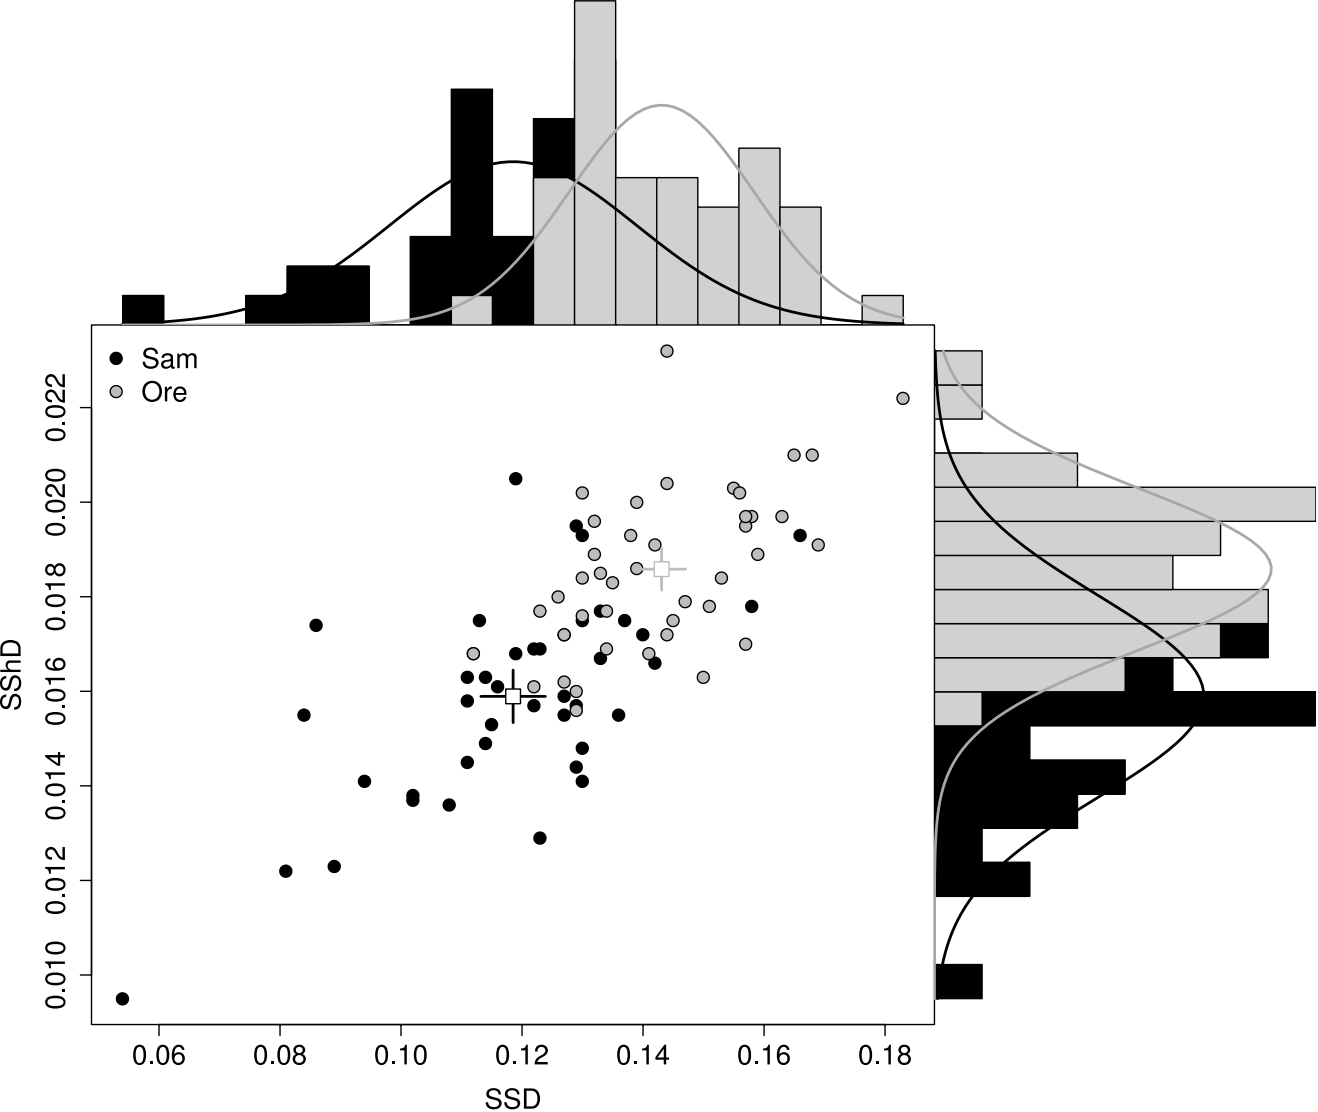

Sam

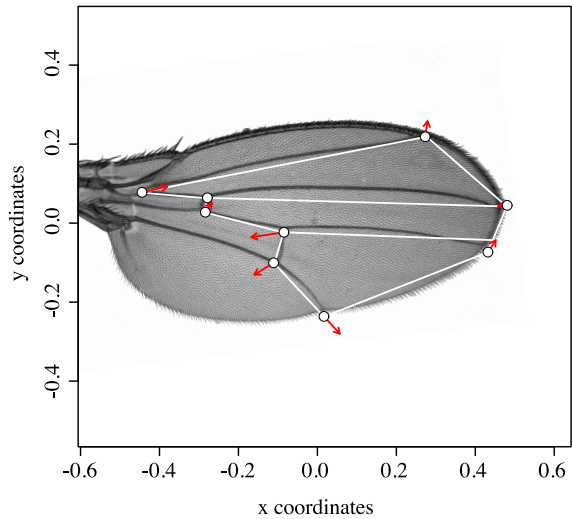

Ore

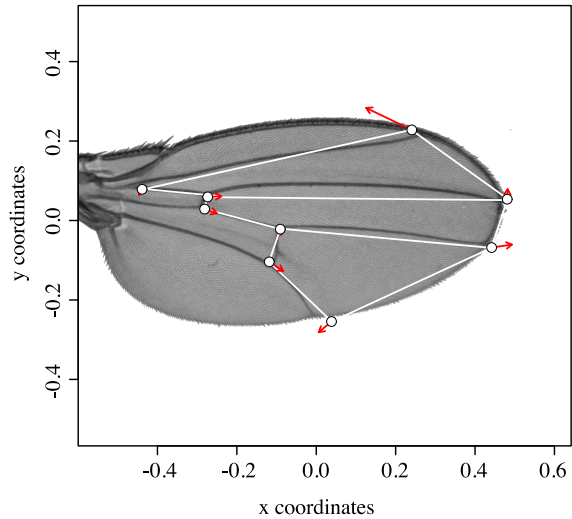

Ore

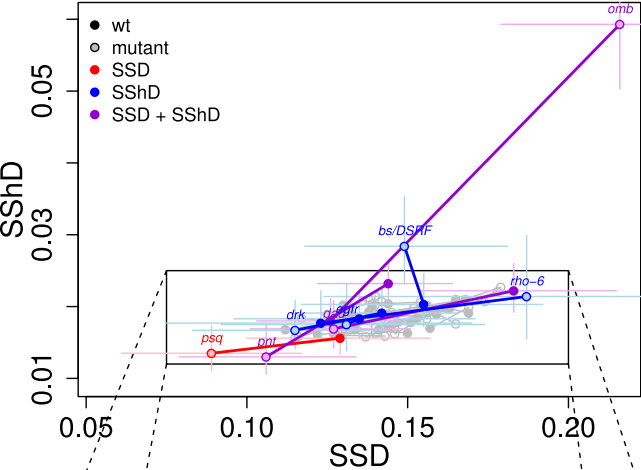

Sam

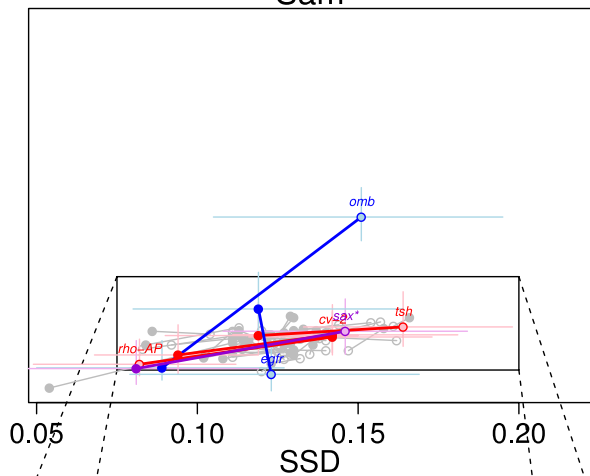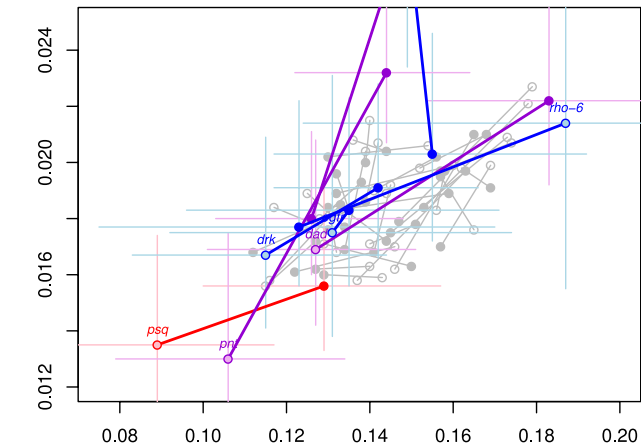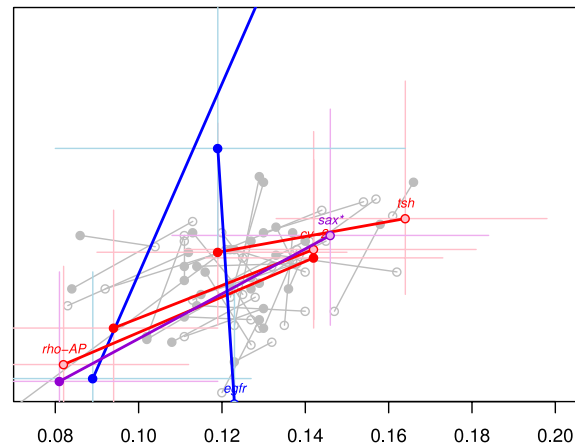

Vector Correlation

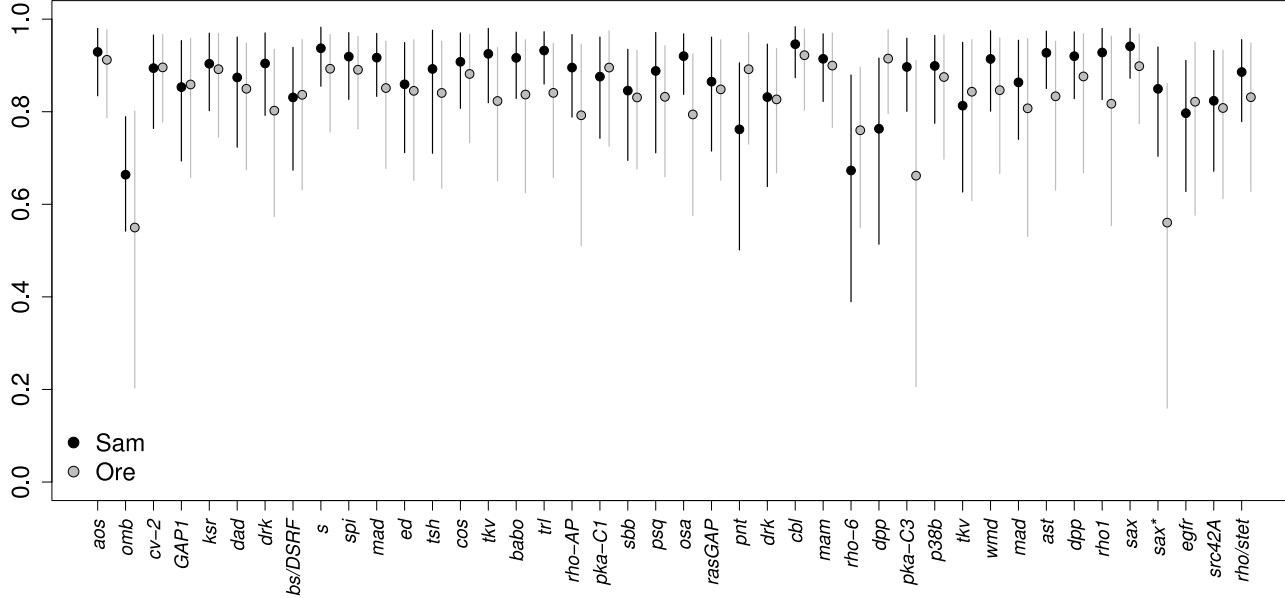



Slope of Allometry

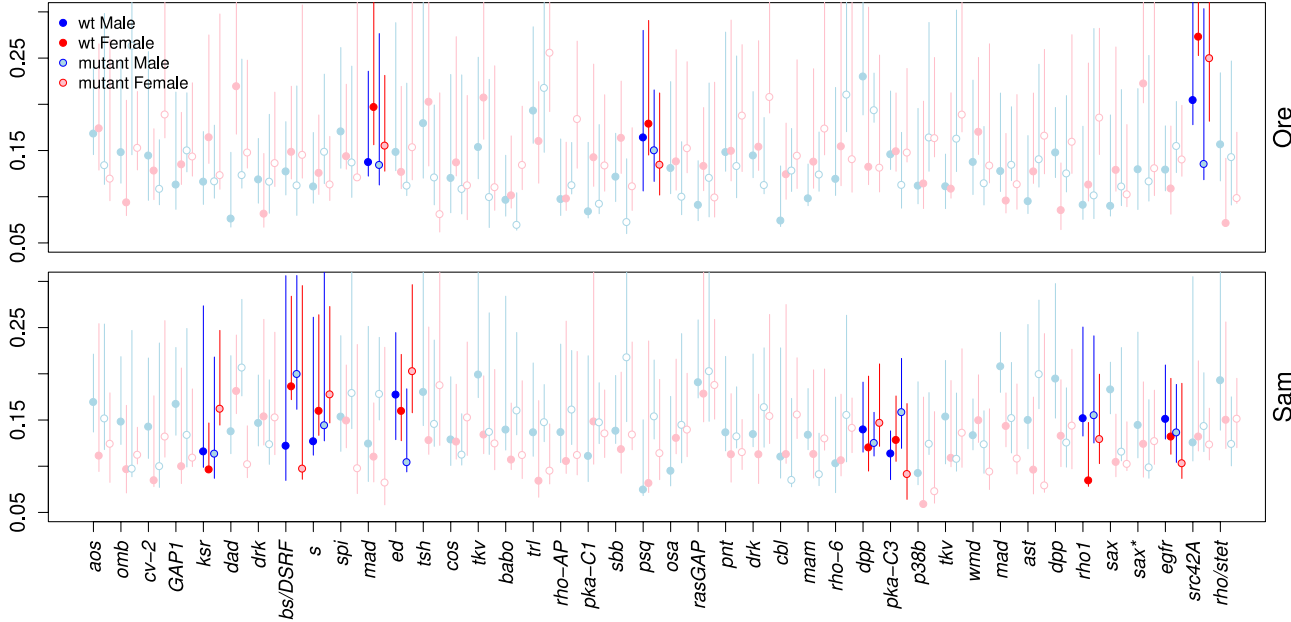

Ore

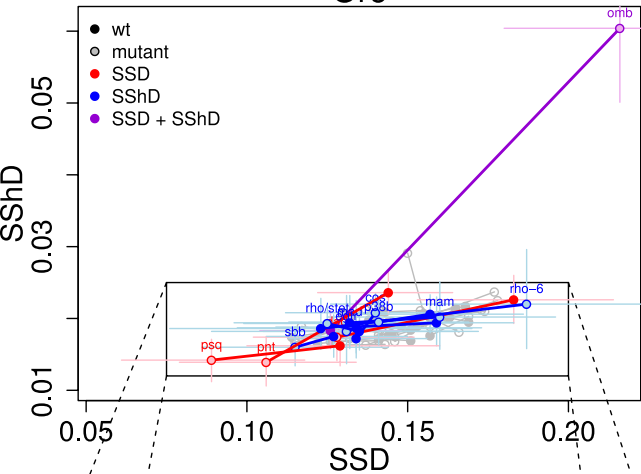

Sam

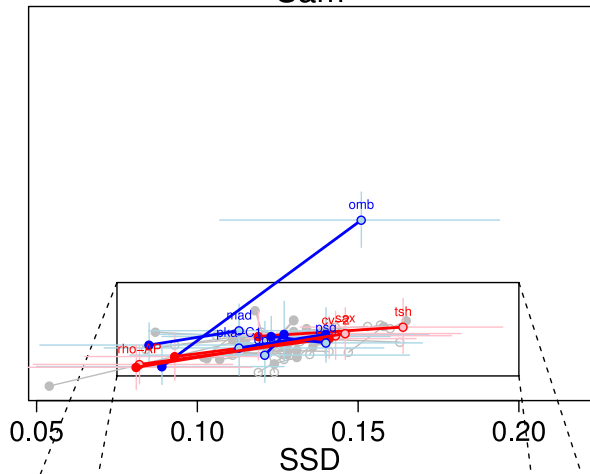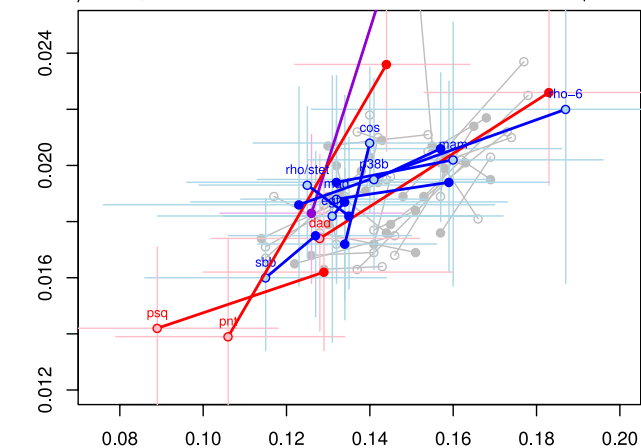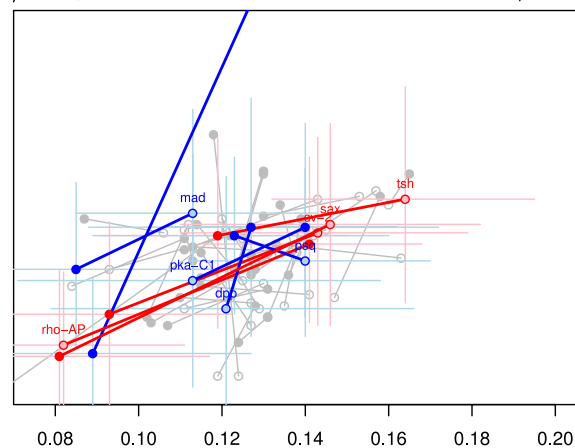

Title: The sex-limited effects of mutations in the EGFR and TGF- $\beta$  signaling pathways on shape and size sexual dimorphism and allometry in the *Drosophila* wing.

Authors:

Nicholas D. Testa<sup>1,2</sup>

Ian Dworkin<sup>1,2,3</sup>

Author Affiliation:

1 - Department of Integrative Biology, Michigan State University

2 - Program in Ecology, Evolutionary Biology and Behavior, Michigan State University

3 - Department of Biology, McMaster University

Author emails:

[dworkin@mcmaster.ca](mailto:dworkin@mcmaster.ca), [testanic@msu.edu](mailto:testanic@msu.edu)

Keywords: Sexual dimorphism, size, shape, allometry, geometric morphometrics, signal transduction, *Drosophila*, mutational analysis

**Table 1:** Summary table of significant effects by background among mutants. All significant values are taken from Figures 1-4. In the case of vector correlations, 80% was chosen arbitrarily to represent only a small subset of mutants of large effect.

| <b>Mutant</b>   | <b>Allele</b> | <b>Pathway</b>       | <b>Δ SSD</b> | <b>Δ SShD</b> | <b>Δ Vector Correlation</b> | <b>Δ Allometry</b> |
|-----------------|---------------|----------------------|--------------|---------------|-----------------------------|--------------------|
| <i>aos</i>      | W11           | Egfr                 |              |               |                             |                    |
| <i>omb</i>      | md653         | TGF-β                | Ore          | Sam, Ore      | Sam, Ore                    |                    |
| <i>cv-2</i>     | 225-3         | TGF-β                |              |               |                             |                    |
| <i>GAP1</i>     | mip-w[+]      | Egfr                 |              |               |                             |                    |
| <i>ksr</i>      | J5E2          | Egfr                 |              |               |                             | Sam                |
| <i>dad</i>      | J1E4          | TGF-β                | Ore          | Ore           |                             |                    |
| <i>drk</i>      | k02401        | Egfr                 |              | Ore           |                             |                    |
| <i>bs/DSRF</i>  | k07909        | Egfr                 |              | Ore           |                             | Sam                |
| <i>s</i>        | k09530        | Egfr                 |              |               |                             | Sam                |
| <i>spi</i>      | s3547         | Egfr                 |              |               |                             |                    |
| <i>mad</i>      | k00237        | TGF-β                |              |               |                             | Ore                |
| <i>ed</i>       | k01102        | Egfr                 |              |               |                             | Sam                |
| <i>tsh</i>      | A3-2-66       | TGF-β                | Sam          |               |                             |                    |
| <i>cos</i>      | k16101        | Hh                   |              |               |                             |                    |
| <i>tkv</i>      | k19713        | TGF-β                |              |               |                             |                    |
| <i>babo</i>     | k16912        | TGF-β/Hh             |              |               |                             |                    |
| <i>trl</i>      | S2325         | TGF-β                |              |               |                             |                    |
| <i>rho-AP</i>   | BG00314       | ?                    | Sam          |               | Sam                         |                    |
| <i>pka-C1</i>   | BG02142       | Hh                   |              |               |                             |                    |
| <i>sbb</i>      | BG01610       | TGF-β                |              |               |                             |                    |
| <i>psq</i>      | kg00811       | Egfr                 | Ore          |               |                             | Ore                |
| <i>osa</i>      | kg03117       | Chromatin Remodeling |              |               | Sam                         |                    |
| <i>rasGAP</i>   | kg02382       | Egfr                 |              |               |                             |                    |
| <i>pnt</i>      | kg04968       | Egfr                 | Ore          | Ore           | Ore                         |                    |
| <i>drk</i>      | k02401        | Egfr                 |              |               |                             |                    |
| <i>cbl</i>      | kg03080       | Egfr                 |              |               |                             |                    |
| <i>mam</i>      | kg02641       | N/Egfr               |              |               |                             |                    |
| <i>rho-6</i>    | kg05638       | Egfr                 |              | Ore           | Sam, Ore                    |                    |
| <i>dpp</i>      | kg04600       | TGF-β                |              |               | Ore                         | Sam                |
| <i>pka-C3</i>   | kg00222       | Hh                   |              |               | Sam                         | Sam                |
| <i>p38b</i>     | kg01337       | TGF-β/Egfr           |              |               |                             |                    |
| <i>tkv</i>      | kg01923       | TGF-β                |              |               |                             |                    |
| <i>wmd</i>      | kg07581       | Unknown              |              |               |                             |                    |
| <i>mad</i>      | kg00581       | TGF-β                |              |               |                             |                    |
| <i>ast</i>      | kg07563       | Egfr                 |              |               |                             |                    |
| <i>dpp</i>      | kg08191       | TGF-β                |              |               |                             |                    |
| <i>rho1</i>     | kg01774       | Egfr?                |              |               |                             | Sam                |
| <i>sax</i>      | kg07525       | TGF-β                |              |               |                             |                    |
| <i>sax*</i>     | sax4          | TGF-β                | Sam          | Sam           | Sam                         |                    |
| <i>egfr</i>     | k05115        | Egfr                 |              | Sam, Ore      | Ore                         | Sam                |
| <i>src42A</i>   | kg02515       | Egfr                 |              |               |                             | Ore                |
| <i>rho/stet</i> | kg07115       | Egfr                 |              |               |                             |                    |

Title: The sex-limited effects of mutations in the EGFR and TGF- $\beta$  signaling pathways on shape and size sexual dimorphism and allometry in the *Drosophila* wing.

Authors:

Nicholas D. Testa<sup>1,2</sup>

Ian Dworkin<sup>1,2,3</sup>

Author Affiliation:

1 - Department of Integrative Biology, Michigan State University

2 - Program in Ecology, Evolutionary Biology and Behavior, Michigan State University

3 - Department of Biology, McMaster University

Author emails:

[dworkin@mcmaster.ca](mailto:dworkin@mcmaster.ca), [testanic@msu.edu](mailto:testanic@msu.edu)

Keywords: Sexual dimorphism, size, shape, allometry, geometric morphometrics, signal transduction, *Drosophila*, mutational analysis

**Supplementary Table 1a:** Significance Table (raw p values) for effects on wing shape where G= genotype, S= sex, B= background and Cs= (centroid) size

| Mutant          | Line  | Allele   | Pathway              | G     | G x S | G x B | Cs x G x S | Cs x G x B | G x S x B | Cs x G x S x B |
|-----------------|-------|----------|----------------------|-------|-------|-------|------------|------------|-----------|----------------|
| <i>aos</i>      | 2513  | W11      | Egfr                 | 0.001 | 0.671 | 0.14  | 0.863      | 0.827      | 0.324     | 0.093          |
| <i>omb</i>      | 3045  | md653    | TGF- $\beta$         | 0.001 | 0.001 | 0.003 | 0.004      | 0.001      | 0.001     | 0.086          |
| <i>cv-2</i>     | 6342  | 225-3    | TGF- $\beta$         | 0.092 | 0.363 | 0.093 | 0.023      | 0.822      | 0.027     | 0.677          |
| <i>GAP1</i>     | 6372  | mip-w[+] | Egfr                 | 0.001 | 0.034 | 0.001 | 0.674      | 0.881      | 0.405     | 0.428          |
| <i>ksr</i>      | 10212 | J5E2     | Egfr                 | 0.001 | 0.935 | 0.193 | 0.057      | 0.89       | 0.364     | 0.248          |
| <i>dad</i>      | 10305 | J1E4     | TGF- $\beta$         | 0.001 | 0.054 | 0.593 | 0.24       | 0.058      | 0.098     | 0.296          |
| <i>drk</i>      | 10372 | k02401   | Egfr                 | 0.001 | 0.046 | 0.482 | 0.478      | 0.544      | 0.57      | 0.796          |
| <i>bs/DSRF</i>  | 10413 | k07909   | Egfr                 | 0.001 | 0.111 | 0.001 | 0.157      | 0.163      | 0.437     | 0.165          |
| <i>s</i>        | 10418 | k09530   | Egfr                 | 0.001 | 0.463 | 0.019 | 0.849      | 0.23       | 0.518     | 0.002          |
| <i>spi</i>      | 10462 | s3547    | Egfr                 | 0.001 | 0.518 | 0.003 | 0.495      | 0.52       | 0.438     | 0.573          |
| <i>mad</i>      | 10474 | k00237   | TGF- $\beta$         | 0.001 | 0.56  | 0.001 | 0.542      | 0.464      | 0.125     | 0.094          |
| <i>ed</i>       | 10490 | k01102   | Egfr                 | 0.001 | 0.88  | 0.012 | 0.07       | 0.051      | 0.542     | 0.046          |
| <i>tsh</i>      | 10842 | A3-2-66  | TGF- $\beta$         | 0.095 | 0.458 | 0.397 | 0.947      | 0.775      | 0.165     | 0.262          |
| <i>cos</i>      | 11156 | k16101   | Hh                   | 0.011 | 0.228 | 0.001 | 0.267      | 0.096      | 0.288     | 0.36           |
| <i>tkv</i>      | 11191 | k19713   | TGF- $\beta$         | 0.001 | 0.121 | 0.001 | 0.358      | 0.813      | 0.26      | 0.161          |
| <i>babo</i>     | 11207 | k16912   | TGF- $\beta$ /Hh     | 0.054 | 0.428 | 0.047 | 0.465      | 0.51       | 0.429     | 0.1            |
| <i>trl</i>      | 12088 | S2325    | TGF- $\beta$         | 0.001 | 0.136 | 0.315 | 0.046      | 0.82       | 0.997     | 0.23           |
| <i>rho-AP</i>   | 12413 | BG00314  | ?                    | 0.523 | 0.006 | 0.005 | 0.983      | 0.815      | 0.196     | 0.098          |
| <i>pka-C1</i>   | 12752 | BG02142  | Hh                   | 0.225 | 0.946 | 0.356 | 0.032      | 0.89       | 0.825     | 0.601          |
| <i>sbb</i>      | 12772 | BG01610  | TGF- $\beta$         | 0.001 | 0.203 | 0.038 | 0.323      | 0.647      | 0.02      | 0.539          |
| <i>psq</i>      | 12916 | kg00811  | Egfr                 | 0.011 | 0.38  | 0.223 | 0.979      | 0.732      | 0.03      | 0.01           |
| <i>osa</i>      | 12945 | kg03117  | Chromatin Remodeling | 0.001 | 0.188 | 0.036 | 0.876      | 0.373      | 0.043     | 0.123          |
| <i>rasGAP</i>   | 13311 | kg02382  | Egfr                 | 0.541 | 0.371 | 0.001 | 0.037      | 0.038      | 0.286     | 0.307          |
| <i>pnt</i>      | 13535 | kg04968  | Egfr                 | 0.002 | 0.063 | 0.021 | 0.173      | 0.752      | 0.504     | 0.609          |
| <i>drk</i>      | 13943 | k02401   | Egfr                 | 0.095 | 0.223 | 0.001 | 0.514      | 0.22       | 0.107     | 0.222          |
| <i>cbl</i>      | 13944 | kg03080  | Egfr                 | 0.003 | 0.459 | 0.018 | 0.765      | 0.57       | 0.947     | 0.195          |
| <i>mam</i>      | 14189 | kg02641  | N/Egfr               | 0.001 | 0.908 | 0.577 | 0.298      | 0.035      | 0.245     | 0.066          |
| <i>rho-6</i>    | 14208 | kg05638  | Egfr                 | 0.809 | 0.35  | 0.814 | 0.448      | 0.72       | 0.152     | 0.25           |
| <i>dpp</i>      | 14268 | kg04600  | TGF- $\beta$         | 0.006 | 0.898 | 0.022 | 0.285      | 0.058      | 0.912     | 0.025          |
| <i>pka-C3</i>   | 14345 | kg00222  | Hh                   | 0.177 | 0.045 | 0.035 | 0.587      | 0.276      | 0.1       | 0.018          |
| <i>p38b</i>     | 14364 | kg01337  | TGF- $\beta$ /Egfr   | 0.247 | 0.59  | 0.031 | 0.566      | 0.906      | 0.771     | 0.902          |
| <i>tkv</i>      | 14403 | kg01923  | TGF- $\beta$         | 0.041 | 0.111 | 0.009 | 0.222      | 0.835      | 0.501     | 0.269          |
| <i>wmd</i>      | 14541 | kg07581  | Unknown              | 0.093 | 0.264 | 0.04  | 0.651      | 0.157      | 0.039     | 0.378          |
| <i>mad</i>      | 14578 | kg00581  | TGF- $\beta$         | 0.002 | 0.651 | 0.153 | 0.815      | 0.199      | 0.216     | 0.753          |
| <i>ast</i>      | 14638 | kg07563  | Egfr                 | 0.014 | 0.972 | 0.074 | 0.211      | 0.934      | 0.666     | 0.781          |
| <i>dpp</i>      | 14694 | kg08191  | TGF- $\beta$         | 0.002 | 0.822 | 0.074 | 0.162      | 0.878      | 0.421     | 0.424          |
| <i>rho1</i>     | 14901 | kg01774  | Egfr?                | 0.082 | 0.059 | 0.353 | 0.083      | 0.677      | 0.082     | 0.03           |
| <i>sax</i>      | 14920 | kg07525  | TGF- $\beta$         | 0.046 | 0.24  | 0.003 | 0.31       | 0.519      | 0.5       | 0.389          |
| <i>sax*</i>     | 5404  | sax4     | TGF- $\beta$         | 0.04  | 0.001 | 0.026 | 0.205      | 0.701      | 0.808     | 0.795          |
| <i>egfr</i>     | 10385 | k05115   | Egfr                 | 0.001 | 0.098 | 0.023 | 0.12       | 0.112      | 0.077     | 0.316          |
| <i>src42A</i>   | 13751 | kg02515  | Egfr                 | 0.001 | 0.057 | 0.023 | 0.054      | 0.212      | 0.617     | 0.13           |
| <i>rho/stet</i> | 14321 | kg07115  | Egfr                 | 0.001 | 0.653 | 0.305 | 0.064      | 0.558      | 0.102     | 0.327          |

**Supplementary Table 1b:** Sample size of treatments, where

M= male, F= female, w= wild-type, m= mutant, O= Oregon-R background, S= Samarkand background

| Mutant   | Line  | M, w, O | F, w, O | M, w,<br>S | F, w, S | M, m, O | F, m, O | M, m, S | F, m, S |
|----------|-------|---------|---------|------------|---------|---------|---------|---------|---------|
| aos      | 2513  | 21      | 20      | 21         | 20      | 20      | 20      | 20      | 22      |
| omb      | 3045  | 19      | 18      | 20         | 20      | 12      | 19      | 19      | 20      |
| cv-2     | 6342  | 10      | 11      | 20         | 20      | 10      | 10      | 20      | 20      |
| GAP1     | 6372  | 19      | 18      | 20         | 19      | 18      | 19      | 20      | 20      |
| ksr      | 10212 | 17      | 20      | 19         | 20      | 20      | 20      | 22      | 20      |
| dad      | 10305 | 20      | 20      | 18         | 20      | 20      | 20      | 20      | 20      |
| drk      | 10372 | 20      | 20      | 20         | 20      | 20      | 20      | 20      | 21      |
| bs/DSRF  | 10413 | 19      | 19      | 20         | 20      | 20      | 19      | 20      | 20      |
| s        | 10418 | 20      | 20      | 18         | 21      | 20      | 20      | 20      | 20      |
| spi      | 10462 | 18      | 20      | 20         | 20      | 20      | 19      | 21      | 21      |
| mad      | 10474 | 19      | 20      | 20         | 22      | 20      | 20      | 18      | 22      |
| ed       | 10490 | 20      | 20      | 19         | 20      | 20      | 20      | 21      | 21      |
| tsh      | 10842 | 19      | 21      | 20         | 20      | 20      | 19      | 22      | 19      |
| cos      | 11156 | 19      | 20      | 19         | 20      | 22      | 19      | 20      | 18      |
| tkv      | 11191 | 20      | 20      | 20         | 21      | 20      | 21      | 18      | 17      |
| babo     | 11207 | 19      | 21      | 20         | 20      | 20      | 20      | 20      | 20      |
| trl      | 12088 | 20      | 20      | 21         | 20      | 20      | 21      | 20      | 20      |
| rho-AP   | 12413 | 20      | 20      | 20         | 20      | 20      | 19      | 20      | 19      |
| pka-C1   | 12752 | 20      | 20      | 18         | 20      | 20      | 20      | 21      | 21      |
| sbb      | 12772 | 20      | 20      | 20         | 19      | 20      | 22      | 20      | 21      |
| psq      | 12916 | 21      | 20      | 21         | 20      | 20      | 20      | 20      | 21      |
| osa      | 12945 | 31      | 30      | 20         | 20      | 30      | 24      | 20      | 20      |
| rasGAP   | 13311 | 19      | 19      | 20         | 19      | 21      | 21      | 20      | 20      |
| pnt      | 13535 | 20      | 20      | 20         | 19      | 20      | 19      | 20      | 20      |
| drk      | 13943 | 20      | 19      | 20         | 21      | 16      | 17      | 21      | 21      |
| cbl      | 13944 | 20      | 20      | 21         | 20      | 20      | 20      | 20      | 20      |
| mam      | 14189 | 10      | 8       | 21         | 21      | 10      | 10      | 20      | 20      |
| rho-6    | 14208 | 19      | 21      | 20         | 20      | 19      | 20      | 20      | 21      |
| dpp      | 14268 | 21      | 20      | 19         | 20      | 20      | 18      | 22      | 18      |
| pka-C3   | 14345 | 21      | 20      | 20         | 20      | 21      | 20      | 20      | 20      |
| p38b     | 14364 | 10      | 10      | 20         | 20      | 10      | 6       | 20      | 20      |
| tkv      | 14403 | 11      | 10      | 10         | 12      | 10      | 11      | 20      | 20      |
| wmd      | 14541 | 20      | 20      | 20         | 21      | 20      | 21      | 21      | 20      |
| mad      | 14578 | 20      | 19      | 22         | 21      | 21      | 19      | 20      | 20      |
| ast      | 14638 | 20      | 20      | 20         | 20      | 20      | 18      | 20      | 20      |
| dpp      | 14694 | 20      | 19      | 19         | 20      | 20      | 20      | 20      | 20      |
| rho1     | 14901 | 20      | 20      | 20         | 21      | 20      | 20      | 20      | 20      |
| sax      | 14920 | 19      | 19      | 20         | 20      | 20      | 20      | 21      | 20      |
| sax*     | 5404  | 20      | 21      | 18         | 19      | 20      | 20      | 20      | 20      |
| egfr     | 10385 | 20      | 19      | 20         | 20      | 20      | 20      | 20      | 20      |
| src42A   | 13751 | 19      | 20      | 19         | 20      | 19      | 20      | 19      | 20      |
| rho/stet | 14321 | 19      | 19      | 19         | 20      | 19      | 21      | 19      | 19      |



Title: The sex-limited effects of mutations in the EGFR and TGF- $\beta$  signaling pathways on shape and size sexual dimorphism and allometry in the *Drosophila* wing.

Authors:

Nicholas D. Testa<sup>1,2</sup>

Ian Dworkin<sup>1,2,3</sup>

Author Affiliation:

1 - Department of Integrative Biology, Michigan State University

2 - Program in Ecology, Evolutionary Biology and Behavior, Michigan State University

3 - Department of Biology, McMaster University

Author emails:

[dworkin@mcmaster.ca](mailto:dworkin@mcmaster.ca), [testanic@msu.edu](mailto:testanic@msu.edu)

Keywords: Sexual dimorphism, size, shape, allometry, geometric morphometrics, signal transduction, *Drosophila*, mutational analysis

**Supplementary Table 2:** Significance Table (raw p values) for effects on wing shape after the effects of allometry are removed where G= genotype, S= sex, B= background and Cs= (centroid) size.

| <b>Mutant</b>   | <b>Line ID</b> | <b>G</b> | <b>G x S</b> | <b>G x B</b> | <b>Cs x G x S</b> | <b>Cs x G x B</b> | <b>G x S x B</b> | <b>Cs x G x S x B</b> |
|-----------------|----------------|----------|--------------|--------------|-------------------|-------------------|------------------|-----------------------|
| <i>aos</i>      | 2513           | 0.098    | 0.221        | 0.001        | 0.664             | 0.31              | 0.236            | 0.625                 |
| <i>omb</i>      | 3045           | 0.001    | 0.072        | 0.001        | 0.6               | 0.311             | 0.002            | 0.264                 |
| <i>cv-2</i>     | 6342           | 0.066    | 0.215        | 0.171        | 0.494             | 0.412             | 0.619            | 0.208                 |
| <i>GAP1</i>     | 6372           | 0.002    | 0.235        | 0.001        | 0.075             | 0.012             | 0.177            | 0.299                 |
| <i>ksr</i>      | 10212          | 0.008    | 0.005        | 0.002        | 0.165             | 0.24              | 0.165            | 0.526                 |
| <i>dad</i>      | 10305          | 0.16     | 0.009        | 0.797        | 0.158             | 0.003             | 0.962            | 0.205                 |
| <i>drk</i>      | 10372          | 0.005    | 0.174        | 0.031        | 0.115             | 0.021             | 0.021            | 0.607                 |
| <i>bs/DSRF</i>  | 10413          | 0.001    | 0.126        | 0.001        | 0.204             | 0.021             | 0.005            | 0.427                 |
| <i>s</i>        | 10418          | 0.001    | 0.002        | 0.106        | 0.377             | 0.188             | 0.009            | 0.107                 |
| <i>spi</i>      | 10462          | 0.001    | 0.527        | 0.002        | 0.558             | 0.371             | 0.025            | 0.359                 |
| <i>mad</i>      | 10474          | 0.001    | 0.019        | 0.005        | 0.594             | 0.656             | 0.005            | 0.746                 |
| <i>ed</i>       | 10490          | 0.001    | 0.778        | 0.591        | 0.998             | 0.225             | 0.393            | 0.164                 |
| <i>tsh</i>      | 10842          | 0.008    | 0.216        | 0.002        | 0.837             | 0.828             | 0.051            | 0.988                 |
| <i>cos</i>      | 11156          | 0.001    | 0.019        | 0.037        | 0.025             | 0.03              | 0.036            | 0.375                 |
| <i>tkv</i>      | 11191          | 0.001    | 0.004        | 0.006        | 0.404             | 0.947             | 0.301            | 0.135                 |
| <i>babo</i>     | 11207          | 0.048    | 0.427        | 0.02         | 0.208             | 0.517             | 0.721            | 0.092                 |
| <i>trl</i>      | 12088          | 0.001    | 0.001        | 0.04         | 0.776             | 0.891             | 0.005            | 0.38                  |
| <i>rho-AP</i>   | 12413          | 0.075    | 0.444        | 0.017        | 0.805             | 0.69              | 0.194            | 0.009                 |
| <i>pka-C1</i>   | 12752          | 0.001    | 0.227        | 0.107        | 0.081             | 0.513             | 0.002            | 0.204                 |
| <i>sbb</i>      | 12772          | 0.001    | 0.537        | 0.004        | 0.703             | 0.001             | 0.396            | 0.069                 |
| <i>psq</i>      | 12916          | 0.004    | 0.283        | 0.143        | 0.677             | 0.127             | 0.048            | 0.823                 |
| <i>osa</i>      | 12945          | 0.001    | 0.255        | 0.02         | 0.699             | 0.492             | 0.728            | 0.368                 |
| <i>rasGAP</i>   | 13311          | 0.027    | 0.666        | 0.031        | 0.565             | 0.587             | 0.792            | 0.607                 |
| <i>pnt</i>      | 13535          | 0.016    | 0.199        | 0.111        | 0.439             | 0.199             | 0.659            | 0.293                 |
| <i>drk</i>      | 13943          | 0.002    | 0.005        | 0.001        | 0.414             | 0.905             | 0.081            | 0.051                 |
| <i>cbl</i>      | 13944          | 0.138    | 0.07         | 0.329        | 0.148             | 0.002             | 0.754            | 0.518                 |
| <i>mam</i>      | 14189          | 0.001    | 0.15         | 0.043        | 0.001             | 0.109             | 0.043            | 0.386                 |
| <i>rho-6</i>    | 14208          | 0.086    | 0.091        | 0.433        | 0.664             | 0.959             | 0.009            | 0.099                 |
| <i>dpp</i>      | 14268          | 0.017    | 0.322        | 0.08         | 0.798             | 0.109             | 0.871            | 0.822                 |
| <i>pka-C3</i>   | 14345          | 0.019    | 0.024        | 0.567        | 0.151             | 0.237             | 0.345            | 0.23                  |
| <i>p38b</i>     | 14364          | 0.003    | 0.498        | 0.171        | 0.542             | 0.001             | 0.466            | 0.6                   |
| <i>tkv</i>      | 14403          | 0.021    | 0.225        | 0.023        | 0.403             | 0.673             | 0.454            | 0.395                 |
| <i>wmd</i>      | 14541          | 0.028    | 0.118        | 0.435        | 0.248             | 0.599             | 0.001            | 0.172                 |
| <i>mad</i>      | 14578          | 0.001    | 0.038        | 0.026        | 0.639             | 0.456             | 0.357            | 0.11                  |
| <i>ast</i>      | 14638          | 0.078    | 0.091        | 0.002        | 0.995             | 0.317             | 0.007            | 0.132                 |
| <i>dpp</i>      | 14694          | 0.001    | 0.299        | 0.045        | 0.476             | 0.027             | 0.56             | 0.801                 |
| <i>rho1</i>     | 14901          | 0.221    | 0.362        | 0.436        | 0.366             | 0.329             | 0.394            | 0.244                 |
| <i>sax</i>      | 14920          | 0.002    | 0.394        | 0.38         | 0.758             | 0.272             | 0.135            | 0.338                 |
| <i>sax*</i>     | 5404           | 0.007    | 0.007        | 0.047        | 0.442             | 0.929             | 0.299            | 0.845                 |
| <i>egfr</i>     | 10385          | 0.001    | 0.125        | 0.03         | 0.742             | 0.393             | 0.014            | 0.211                 |
| <i>src42A</i>   | 13751          | 0.031    | 0.37         | 0.002        | 0.384             | 0.195             | 0.411            | 0.586                 |
| <i>rho/stet</i> | 14321          | 0.002    | 0.156        | 0.19         | 0.02              | 0.12              | 0.207            | 0.421                 |
